# Supplementary material for: Synthesis, characterization, crystal structure, and fabrication of photosensitive Schottky device of a binuclear Cu(ii)-Salen complex: a DFT investigations
Source: Royal Society of Chemistry journal article supplement (doi:10.1039/d4ra01846j), 2024-01-01
Supplement: d4ra01846j1.pdf [file d4ra01846j1.pdf]

**Synthesis, characterization, crystal structure, and fabrication of photosensitive Schottky device of a binuclear Cu(II)-Salen complex: A DFT investigations.**

Dhrubajyoti Majumdar <sup>a\*</sup>, Bouzid Gassoumi <sup>b</sup>, Arka Dey <sup>c</sup>, Sourav Roy <sup>d</sup>, Sahbi Ayachi <sup>e</sup>,  
Suman Hazra <sup>a, f</sup>, Sudipta Dalai <sup>f\*</sup>

<sup>a</sup>Department of Chemistry, Tamralipta Mahavidyalaya, Tamluk-721636, West Bengal, India.

<sup>b</sup>Laboratory of Advanced Materials and Interfaces (LIMA), University of Monastir, Faculty of Sciences of Monastir, Avenue of Environment, 5000 Monastir, Tunisia.

<sup>c</sup>Department of Physics, National Institute of Technology Durgapur, Durgapur 713209, India.

<sup>d</sup> Solid State and Structural Chemistry Unit, Indian Institute of Science, Bangalore-560012, India.

<sup>e</sup>Laboratory of Physico-Chemistry of Materials (LR01ES19), Faculty of Sciences, Avenue of the environment 5019 Monastir, University of Monastir, Tunisia.

<sup>f</sup>Department of Chemistry, Vidyasagar University, Midnapore-7211102, West Bengal, India.

**Corresponding author EMAIL:** dmajumdar30@gmail.com, sudipta@mail.vidyasagar.ac.in

## ***Contents of Electronic Supporting Materials***

- |                                                                                                                                                                    |                     |
|--------------------------------------------------------------------------------------------------------------------------------------------------------------------|---------------------|
| 1. Optical Characterization.                                                                                                                                       | <b>Section 1.1.</b> |
| 2. Device Fabrication.                                                                                                                                             | <b>Section 1.2.</b> |
| 3. Optical Characterization.                                                                                                                                       | <b>Section 1.3.</b> |
| 4. Schematic depiction of an electrical conductivity-based photo-sensitive switching device fabricated with a metal complex with H <sub>2</sub> L <sup>SAL</sup> . | <b>Scheme S1.</b>   |
| 5. Cu(II)-complexes and Schiff base ligands bandgap value ensure semiconductor.                                                                                    | <b>Table S1.</b>    |
| 6. Selected some important bond distances (Å) and angles (°) in the complex.                                                                                       | <b>Table S2</b>     |
| 7. Schiff base metal complexes utilized in the making of electrical conductivity-based photosensitive switching devices.                                           | <b>Table S3</b>     |
| 8. (a) The XPS spectral data of the Ligand and Cu(II)-complex (binding energy/BE (eV)).                                                                            | <b>Table S4</b>     |
| (b) Different interaction energies of the molecular pairs in the complex (kJ/mol).                                                                                 | <b>Table S5</b>     |
| (c) Computed NBO parameters of the current compound.                                                                                                               | <b>Table S6</b>     |
| (d) Charge conducting parameters of CTFD.                                                                                                                          | <b>Table S7</b>     |
| 9. (a) The absorbance spectrum (inset) and the optical Band gap of H <sub>2</sub> L <sup>SAL</sup> and the complex from Tauc's plots.                              | <b>FIGURE S1A.</b>  |
| (b) IR spectrum of H <sub>2</sub> L <sup>SAL</sup> .                                                                                                               | <b>FIGURE S1B.</b>  |

- (c) Capacitance vs. Frequency graph of **CTFD**. **FIGURE S1C.**
10. IR spectrum of complex. **FIGURE S2.**
11. Raman spectrum of the complex. **FIGURE S3.**
12. Ligand ( $\text{H}_2\text{L}^{\text{SAL}}$ ) UV-Visible spectrum. **FIGURE S4.**
- 13.. Complex UV-Visible spectrum. **FIGURE S5.**
14. Complex DRS spectrum. **FIGURE S6.**
15.  $^1\text{H}$  NMR spectra of  $\text{H}_2\text{L}^{\text{SAL}}$ . **FIGURE S7.**
16.  $^{13}\text{C}$  NMR spectra of  $\text{H}_2\text{L}^{\text{SAL}}$ . **FIGURE S8.**
17.  $^1\text{H}$  NMR spectra of complex. **FIGURE S9.**
18. Complex EDX profiles. **FIGURE S10.**
19. SEM micrographs (1-6) for  $\text{H}_2\text{L}^{\text{SAL}}$ . **FIGURE S11.**
20. SEM micrographs (1-6) for the copper complex. **FIGURE S12.**
21. Copper complex PXRD graph. **FIGURE S13.**
22. (a) XPS spectra of (1) O1s, (2) N1s, (3) C1s, and (4) Cu2p **FIGURE S14.**
22. ORTEP view of the complex. **FIGURE S15.**
23. QTAIM graph depicting BCPs of the studied complex. **FIGURE S16.**
24.  $dV/dlnI$  vs.  $I$  and (B)  $H$  vs.  $I$  curve for **CTFD** under dark and **FIGURE S17A-17B.**  
photo illumination conditions.
25. A probable mechanism of photosensitivity of the copper complex. **FIGURE S18.**

## Section 1.1.

### Optical Characterization

The optical band gap ( $E_g$ ) was calculated using Tauc's equation (Equation S1).<sup>S1</sup>

$$\alpha h\nu = A(h\nu - E_g)^n \quad (S1)$$

Where  $\alpha$ ,  $E_g$ ,  $h$ , and  $\nu$  stands for absorption coefficient, band gap, Planck's constant, and frequency of light. The exponent ' $n$ ' is the electron transition processes dependent constant. ' $A$ ' is a constant, considered as 1 for the ideal case. To calculate the direct optical bandgap the value of the exponent ' $n$ ' in the above equation has been considered as  $n = 1/2$ .<sup>1</sup> By extrapolating the linear region of the plot  $(\alpha h\nu)^2$  vs.  $h\nu$  (Figure 1(A) and (B)) to absorptions, the values of optical direct band gap of the complex ( $E_{gC}$ ) and the ligand ( $H_2L^{SAL}$ ) ( $E_{gL}$ ) have been calculated as 3.07 eV, and 3.09 eV (Figure 1(A) and (B) in the main manuscript).

## Section 1.2.

### Device Fabrication

In this study, multiple thin film devices were fabricated in ITO/synthesized Material (complex and ligand)/Al sandwich structure to perform the electrical research. In this regard, well dispersion of the synthesized complex and ligand was made in N, N-dimethyl formamide (DMF) by mixing and sonicating the Complex's equal and right proportion (15 mg/ml) in a vial. This prepared stable dispersion of the compound was deposited on the top of the ITO-coated glass substrate by spinning at 700 rpm for 5 minutes and, after that, at 1000 rpm for another 5 minutes with the help of the SCU 2700 spin coating unit. Afterwards, the as-deposited thin film was dried in a vacuum oven at 75 °C for several minutes to evaporate the solvent part fully. Here, we used aluminium as the metal electrode and deposited it on a dried thin film of prepared complexes in the thermal vapour deposition Unit. Here, **CTFD** represents the thin

film device made from Complex, and **LTFD** is the thin film device made from ligand, respectively. The source meter (made by Keithley Model No: 2400) and two probe techniques have been implemented to collect the fabricated devices' current-voltage ( $I$ - $V$ ) features, helping to determine the electrical properties. In the experiment section, the light source used for electrical characterization is a 300 W ozone-free Xenon arc lamp, which emits broadband white light ranging from 300-800 nm.

### Section 1.3.

#### Optical Characterization

The  $I$ - $V$  characteristic of **CTFD** was further analyzed by thermionic emission theory. Cheung's method has also been employed to extract important diode parameters.<sup>S1</sup> In this regard, the obtained  $I$ - $V$  curve was analyzed quantitatively by considering the following standard equations:<sup>S1, S2</sup>

$$I = I_0 \exp\left(\frac{qV}{\eta kT}\right) \left[1 - \exp\left(\frac{-qV}{\eta kT}\right)\right] \quad (S2)$$

$$I_0 = AA^* T^2 \exp\left(\frac{-q\phi_B}{kT}\right) \quad (S3)$$

where,  $I_0$ ,  $k$ ,  $T$ ,  $V$ ,  $A$ ,  $\eta$ , and  $A^*$  stands for saturation current, electronic charge, the Boltzmann constant, temperature in Kelvin, forward bias voltage, effective diode area, ideality factor, and effective Richardson constant, respectively. The effective diode area has been estimated as  $7.065 \times 10^{-2} \text{ cm}^2$  and the effective Richardson constant has been considered as  $32 \text{ AK}^{-2} \text{ cm}^{-2}$  for all the devices. The series resistance, ideality factor, and barrier potential height were also determined by using equations S4 to S6, which were extracted from Cheung's idea,<sup>S3, S4</sup>

$$\frac{dV}{d \ln(I)} = \left(\frac{\eta kT}{q}\right) + IR_s \quad (S4)$$

$$H(I) = V - \left( \frac{\eta kT}{q} \right) \ln \left( \frac{I_S}{AA^* T^2} \right)$$

(S5)

$$H(I) = IR_S + \eta\phi_B \quad (S6)$$

From the saturated values of capacitance at the higher frequency regime, (Figure S1) the dielectric permittivity of the complex was calculated using the following equation:<sup>S1</sup>

$$\epsilon_r = \frac{1}{\epsilon_0} \frac{C \cdot D}{A} \quad (S7)$$

where,  $C$  is the capacitance (at saturation),  $D$  is the thickness of the film which has been considered as  $\sim 1 \mu\text{m}$  and  $A$  is the effective area. Using the above formula, the relative dielectric constant of the Complex has been estimated as  $5.35 \times 10^{-1}$ .

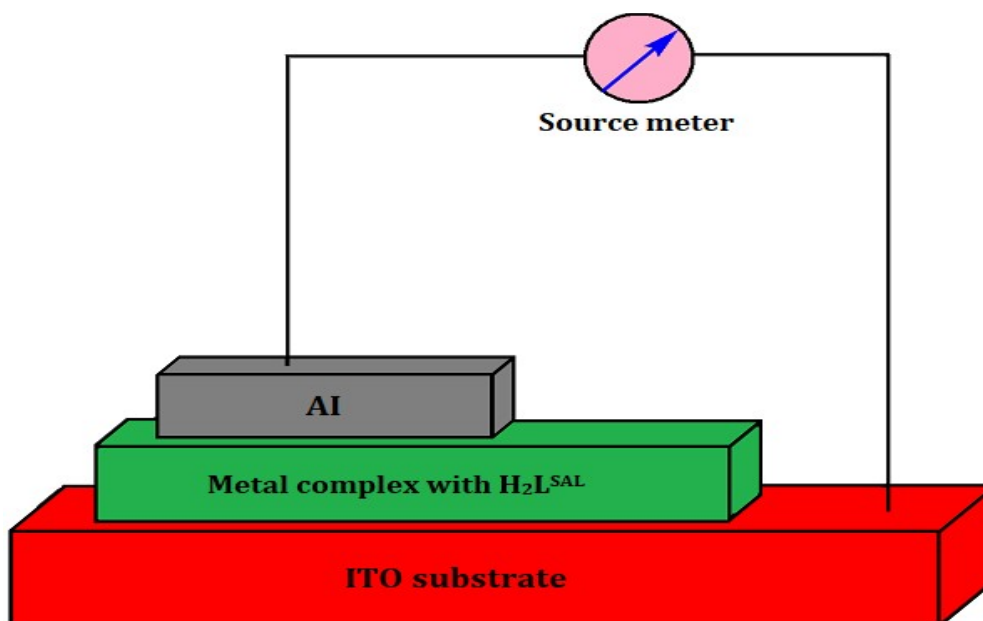

**Scheme S1.** Schematic depiction of an electrical conductivity-based photo-sensitive switching device fabricated with a Metal-complex with  $\text{H}_2\text{L}^{\text{SAL}}$ .

**Table S1** Published Cu(II)-complexes and Schiff base ligands (L) bandgap value ensure semiconductor function.

| Complexes                                                                                                    | Optical band gap value (eV) | References       |
|--------------------------------------------------------------------------------------------------------------|-----------------------------|------------------|
| [Cu(L) $\mu$ -1,1-N <sub>3</sub> ]                                                                           | 2.84                        | 1                |
| [Cu(fum)(4-phpy) <sub>2</sub> (H <sub>2</sub> O)]                                                            | 2.67                        | 2                |
| [Cu(nip)(4-brpy) <sub>2</sub> ]                                                                              | 3.97                        | 3                |
| [Cu <sub>2</sub> (adc)(4-pic) <sub>6</sub> (H <sub>2</sub> O) <sub>4</sub> ][ClO <sub>4</sub> ] <sub>2</sub> | 3.10                        | 4                |
| [Cu <sub>2</sub> (bpd) <sub>2</sub> (nac) <sub>2</sub> ].2CH <sub>3</sub> CN.2H <sub>2</sub> O               | 3.46                        | 5                |
| [CuL(NCS)]                                                                                                   | 2.99                        | 6                |
| [Cu <sub>2</sub> L <sub>2</sub> ( $\mu$ -1,3-SCN) <sub>2</sub> ] <sub>n</sub>                                | 2.95                        | 7                |
| [CuL <sup>1</sup> ( $\mu$ -1,3-N <sub>3</sub> )] <sub>∞</sub>                                                | 2.91                        | 8                |
| [Cu <sub>2</sub> L <sup>2</sup> ( $\mu$ -1,1-N <sub>3</sub> )( $\mu$ -1,3-N <sub>3</sub> )] <sub>∞</sub>     | 2.89                        |                  |
| Schiff base [1,4-bis-(quinolin-6-yliminomethyl) benzene (BQB)]                                               | 3.46                        | 9                |
| Schiff base [ <i>N</i> - <i>N</i> -(1,2-diphenyl ethane-1,2-diylidene)bis(3-Nitrobenzohydrazide)]            | 2.67                        | 10               |
| <b>H<sub>2</sub>L<sup>SAL</sup></b>                                                                          | <b>3.09</b>                 | <b>This work</b> |
| <b>[Cu<sub>2</sub>(L<sup>SAL</sup>)<sub>2</sub>]</b>                                                         | <b>3.07</b>                 | <b>This work</b> |

**Table S2** Selected some important bond distances (Å) and angles (°) in the complex.

| Atom | Atom            | Length/Å    | Atom | Atom | Length/Å  |
|------|-----------------|-------------|------|------|-----------|
| Cu1  | N1              | 1.953 (2)   | C6   | C5   | 1.417 (4) |
| Cu1  | O1              | 1.9073 (18) | C1   | C2   | 1.408 (4) |
| Cu1  | O2 <sup>1</sup> | 2.4120 (17) | C2   | C3   | 1.375 (4) |
| Cu1  | O2              | 1.9406 (17) | C3   | C4   | 1.388 (5) |
| Cu1  | N2              | 1.948 (2)   | C4   | C5   | 1.360 (5) |
| N1   | C7              | 1.287 (3)   | C8   | C9   | 1.516 (4) |
| N1   | C8              | 1.470 (3)   | C10  | C11  | 1.430 (4) |
| O1   | C1              | 1.310 (3)   | C11  | C16  | 1.417 (4) |
| O2   | C16             | 1.324 (3)   | C11  | C12  | 1.411 (4) |
| N2   | C9              | 1.455 (3)   | C16  | C15  | 1.404 (4) |
| N2   | C10             | 1.289 (3)   | C15  | C14  | 1.388 (4) |
| C7   | C6              | 1.425 (4)   | C14  | C13  | 1.382 (5) |
| C6   | C1              | 1.425 (4)   | C13  | C12  | 1.357 (5) |

$$1=3/2-x,1/2-y,1-z$$

| Atom | Atom | Atom             | Angle/°     | Atom | Atom | Atom | Angle/°   |
|------|------|------------------|-------------|------|------|------|-----------|
| N1   | Cu1  | O2 <sup>1</sup>  | 102.38 (7)  | C5   | C6   | C7   | 117.6 (3) |
| O1   | Cu1  | N1               | 92.77 (8)   | C5   | C6   | C1   | 119.1 (3) |
| O1   | Cu1  | O2 <sup>1</sup>  | 93.90 (7)   | O1   | C1   | C6   | 124.5 (2) |
| O1   | Cu1  | O2               | 91.13 (7)   | O1   | C1   | C2   | 118.5 (2) |
| O1   | Cu1  | N2               | 171.09 (8)  | C2   | C1   | C6   | 116.9 (2) |
| O2   | Cu1  | N1               | 170.32 (8)  | C3   | C2   | C1   | 122.1 (3) |
| O2   | Cu1  | O2 <sup>1</sup>  | 86.17 (7)   | C2   | C3   | C4   | 120.8 (3) |
| O2   | Cu1  | N2               | 91.44 (8)   | C5   | C4   | C3   | 119.0 (3) |
| N2   | Cu1  | N1               | 83.42 (9)   | C4   | C5   | C6   | 122.1 (3) |
| N2   | Cu1  | O2 <sup>1</sup>  | 94.78 (8)   | N1   | C8   | C9   | 108.0 (2) |
| C7   | N1   | Cu1              | 126.68 (19) | N2   | C9   | C8   | 107.3 (2) |
| C7   | N1   | C8               | 119.6 (2)   | N2   | C10  | C11  | 124.6 (2) |
| C8   | N1   | Cu1              | 113.59 (17) | C16  | C11  | C10  | 123.3 (2) |
| C1   | O1   | Cu1              | 126.93 (17) | C12  | C11  | C10  | 117.8 (3) |
| Cu1  | O2   | Cu1 <sup>1</sup> | 93.83 (7)   | C12  | C11  | C16  | 118.9 (3) |



| Atom | Atom | Atom             | Angle/°     | Atom | Atom | Atom | Angle/°   |
|------|------|------------------|-------------|------|------|------|-----------|
| C16  | O2   | Cu1              | 125.17 (16) | O2   | C16  | C11  | 124.2 (2) |
| C16  | O2   | Cu1 <sup>1</sup> | 110.16 (14) | O2   | C16  | C15  | 117.8 (2) |
| C9   | N2   | Cu1              | 111.96 (17) | C15  | C16  | C11  | 118.0 (2) |
| C10  | N2   | Cu1              | 126.41 (19) | C14  | C15  | C16  | 121.1 (3) |
| C10  | N2   | C9               | 121.2 (2)   | C13  | C14  | C15  | 120.6 (3) |
| N1   | C7   | C6               | 124.8 (2)   | C12  | C13  | C14  | 119.5 (3) |
| C1   | C6   | C7               | 123.2 (2)   | C13  | C12  | C11  | 122.0 (3) |

$$1=3/2-x, 1/2-y, 1-z$$

**Table S3** Schiff base metal complexes utilized in the making of electrical conductivity-based photosensitive switching devices.

| SL No. | Structure                                                                           | Conductivity (under dark) (S m <sup>-1</sup> ) | Conductivity (in light) (S m <sup>-1</sup> ) | Ref |
|--------|-------------------------------------------------------------------------------------|------------------------------------------------|----------------------------------------------|-----|
| 1      | 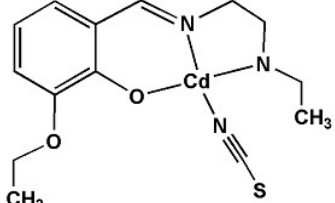  | $1.01 \times 10^{-6}$                          | $2.16 \times 10^{-6}$                        | 11  |
| 2      |  | $4.53 \times 10^{-5}$                          | $1.93 \times 10^{-4}$                        | 12  |

|   |                                                                                     |                       |                        |    |
|---|-------------------------------------------------------------------------------------|-----------------------|------------------------|----|
| 3 | 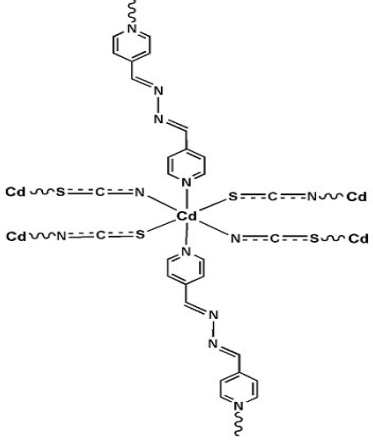   | $2.90 \times 10^{-4}$ | $7.16 \times 10^{-4}$  | 13 |
| 4 |    | $8.26 \times 10^{-2}$ | $22.07 \times 10^{-2}$ | 14 |
| 5 |  | $2.02 \times 10^{-2}$ | $8.55 \times 10^{-2}$  | 15 |
| 6 |  | $3.63 \times 10^{-3}$ | $4.13 \times 10^{-3}$  | 16 |
| 7 |  | $2.13 \times 10^{-3}$ | $3.19 \times 10^{-3}$  | 17 |

|    |                                                                                     |                       |                       |    |
|----|-------------------------------------------------------------------------------------|-----------------------|-----------------------|----|
| 8  | 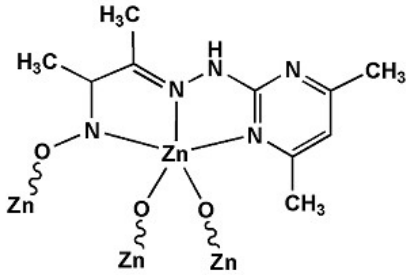   | $3.99 \times 10^{-3}$ | $7.13 \times 10^{-3}$ | 18 |
| 9  |    | $1.26 \times 10^{-6}$ | $6.72 \times 10^{-5}$ | 19 |
| 10 |   | $1.07 \times 10^{-7}$ | $2.44 \times 10^{-7}$ | 20 |
| 11 |  | $1.78 \times 10^{-7}$ | $6.15 \times 10^{-7}$ | 21 |

|    |                                                                                     |                       |                        |    |
|----|-------------------------------------------------------------------------------------|-----------------------|------------------------|----|
| 12 | 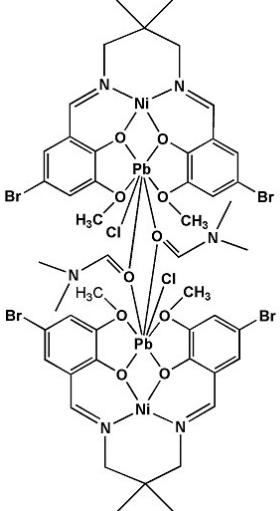   | $7.47 \times 10^{-4}$ | $23.12 \times 10^{-4}$ | 22 |
| 13 |   | $2.94 \times 10^{-6}$ | $6.12 \times 10^{-6}$  | 23 |
| 14 |  | $2.92 \times 10^{-7}$ | $3.66 \times 10^{-7}$  | 24 |
| 15 |  | $0.88 \times 10^{-8}$ | $2.38 \times 10^{-8}$  | 25 |

|    |                                                                                     |                       |                        |    |
|----|-------------------------------------------------------------------------------------|-----------------------|------------------------|----|
| 16 | 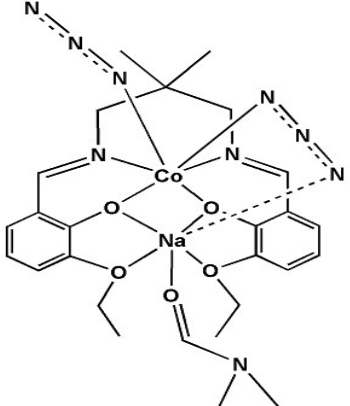   | $8.24 \times 10^{-5}$ | $14.03 \times 10^{-5}$ | 26 |
| 17 |    | $7.0 \times 10^{-5}$  | $3.5 \times 10^{-4}$   | 27 |
| 18 |  | $2.0 \times 10^{-5}$  | $4.9 \times 10^{-4}$   | 28 |
| 19 |  | $6.49 \times 10^{-4}$ | $21.29 \times 10^{-4}$ | 29 |

|    |  |                       |                       |    |
|----|--|-----------------------|-----------------------|----|
| 20 |  | $13.1 \times 10^{-6}$ | $11.2 \times 10^{-5}$ | 30 |
| 21 |  | $5.4 \times 10^{-6}$  | $13.5 \times 10^{-5}$ | 31 |
| 22 |  | $0.87 \times 10^{-3}$ | $2.45 \times 10^{-3}$ | 32 |

|    |                                                                                     |                       |                       |    |
|----|-------------------------------------------------------------------------------------|-----------------------|-----------------------|----|
| 23 | 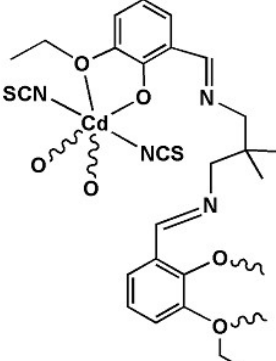   | $3.89 \times 10^{-4}$ | $8.25 \times 10^{-4}$ | 33 |
| 24 |   | $1.81 \times 10^{-4}$ | $4.72 \times 10^{-4}$ | 34 |
| 25 |  | $8.07 \times 10^{-3}$ | $9.26 \times 10^{-3}$ | 35 |

|    |                                                                                    |                       |                        |                  |
|----|------------------------------------------------------------------------------------|-----------------------|------------------------|------------------|
| 26 | 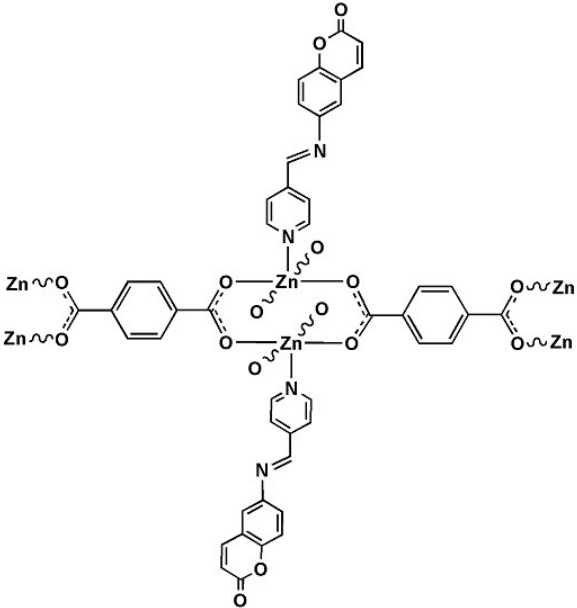  | $2.53 \times 10^{-9}$ | $5.97 \times 10^{-5}$  | 36               |
| 27 |  | $3.69 \times 10^{-4}$ | $10.68 \times 10^{-4}$ | 37               |
| 28 | <b>[Cu<sub>2</sub>(L<sup>SAL</sup>)]</b>                                           | $2.41 \times 10^{-7}$ | $4.27 \times 10^{-7}$  | <b>This work</b> |

**Table S4** The XPS spectral data of the Ligand and Cu(II)-complex (binding energy/BE (eV))

| Compounds               | C1s    | O1s            | N1s    | Cl1s | Cu2p   |
|-------------------------|--------|----------------|--------|------|--------|
| L (Common Salen ligand) | 285.1  | 530.3          | 398.8  | --   | -      |
|                         | 286.0  | 532.2<br>533.8 | 402.2  |      |        |
| Cu-complex              | 285.74 | 532.16         | 399.64 | --   | 935.31 |
|                         |        |                | 402.01 |      | 954.80 |



**Table S5** Different interaction energies of the molecular pairs in the complex (kJ/mol).

| <b>N</b> | <b>Symmetry Operations</b> | <b>R(Å)</b> | <b>Electron Density</b> | <b>E<sub>ele</sub></b> | <b>E<sub>pol</sub></b> | <b>E<sub>dis</sub></b> | <b>E<sub>rep</sub></b> | <b>E<sub>tot</sub></b> |
|----------|----------------------------|-------------|-------------------------|------------------------|------------------------|------------------------|------------------------|------------------------|
| 2        | x,y,z                      | 6.98        | HF/3-21G                | -25.6                  | -10.9                  | -35.0                  | 16.5                   | -51.4                  |
| 1        | -x+1/2, -y+1/2, -z         | 7.97        | HF/3-21G                | 8.3                    | -2.1                   | -18.5                  | 11.1                   | -0.6                   |
| 1        | -x,-y,-z                   | 13.05       | HF/3-21G                | -4.5                   | -0.8                   | -9.4                   | 3.6                    | -10.7                  |
| 2        | x+1/2, y+1/2, z            | 13.76       | HF/3-21G                | 1.7                    | -0.4                   | -7.6                   | 3.3                    | -2.7                   |
| 2        | -x+1/2, y+1/2, -z+1/2      | 5.19        | HF/3-21G                | -8.3                   | -13.6                  | -66.4                  | 34.1                   | -49.5                  |
| 1        | -x+1/2, -y+1/2, -z         | 3.68        | HF/3-21G                | -108.8                 | -59.6                  | -100.3                 | 117.1                  | -145.0                 |
| 2        | x+1/2, y+1/2, z            | 13.76       | HF/3-21G                | 0.4                    | -0.5                   | -9.0                   | 4.9                    | -4.1                   |
| 1        | -x, y, -z+1/2              | 13.57       | HF/3-21G                | 1.1                    | -0.4                   | -4.5                   | 0.5                    | -2.8                   |
| 1        | -x+1/2, -y+1/2, -z         | 7.80        | HF/3-21G                | -5.1                   | -2.5                   | -10.8                  | 2.9                    | -14.2                  |
| 1        | -x, y, -z+1/2              | 14.14       | HF/3-21G                | 0.2                    | -0.2                   | -4.6                   | 1.6                    | -2.8                   |

**Table S6** Computed NBO parameters of the copper complex.

| <b>Donor (i)</b> | <b>Type of Bond</b> | <b>Occupancy</b> | <b>Acceptor (j)</b> | <b>Type of Bond</b> | <b>Occupancy</b> | <b>E<sup>(2)</sup> (Kcal/mol)</b> | <b>ε(j)-ε(i) (a.u)</b> | <b>F(i, j) (a.u)</b> |
|------------------|---------------------|------------------|---------------------|---------------------|------------------|-----------------------------------|------------------------|----------------------|
| <b>Cu 1</b>      | LP*( 6)             | 0.26628          | Cu 1                | LP*( 8)             | 0.12054          | 11.41                             | 0.04                   | 0.043                |
|                  | LP*( 6)             | 0.26628          | Cu 1                | RY*( 1)             | 0.00128          | 19.54                             | 2.75                   | 0.565                |
|                  | LP*( 6)             | 0.26628          | Cu 1                | RY*( 3)             | 0.00067          | 14.09                             | 1.33                   | 0.334                |
|                  | LP*( 6)             | 0.26628          | Cu 1                | RY*( 7)             | 0.12335          | 17.82                             | 0.23                   | 0.156                |
|                  | LP*( 6)             | 0.26628          | Cu 1                | RY*( 8)             | 0.12054          | 15.36                             | 2.74                   | 0.501                |
| <b>N 2</b>       | LP ( 1)             | 1.72921          | Cu 1                | LP*( 5)             | 1.56245          | 18.78                             | 0.13                   | 0.074                |
|                  | LP ( 1)             | 1.72921          | Cu 1                | LP*( 6)             | 0.26628          | 40.50                             | 0.63                   | 0.143                |
|                  | LP ( 1)             | 1.72921          | Cu 1                | LP*( 8)             | 0.12054          | 17.46                             | 0.67                   | 0.100                |
| <b>O 3</b>       | LP ( 1)             | 1.92365          | Cu 1                | LP*( 7)             | 0.12335          | 15.45                             | 0.78                   | 0.099                |
|                  | LP ( 1)             | 1.92365          | Cu 1                | LP*( 8)             | 0.12054          | 11.94                             | 0.81                   | 0.089                |
|                  | LP ( 2)             | 1.76286          | Cu 1                | LP*( 5)             | 1.56245          | 15.12                             | 0.12                   | 0.067                |
|                  | LP ( 2)             | 1.76286          | Cu 1                | LP*( 6)             | 0.26628          | 27.18                             | 0.63                   | 0.117                |
|                  | LP ( 2)             | 1.76286          | Cu 1                | LP*( 7)             | 0.12335          | 19.85                             | 0.63                   | 0.103                |
| <b>O 4</b>       | LP ( 1)             | 1.92236          | Cu 1                | LP*( 8)             | 0.12054          | 24.07                             | 0.81                   | 0.126                |
|                  | LP ( 2)             | 1.76758          | Cu 1                | LP*( 5)             | 1.56245          | 14.78                             | 0.13                   | 0.067                |
|                  | LP ( 2)             | 1.76758          | Cu 1                | LP*( 6)             | 0.26628          | 28.38                             | 0.63                   | 0.121                |
|                  | LP ( 2)             | 1.76758          | Cu 1                | LP*( 8)             | 0.12054          | 17.50                             | 0.64                   | 0.100                |
| <b>N 5</b>       | LP ( 1)             | 1.71887          | Cu 1                | LP*( 5)             | 1.56245          | 19.43                             | 0.13                   | 0.074                |
|                  | LP ( 1)             | 1.71887          | Cu 1                | LP*( 6)             | 0.26628          | 40.11                             | 0.63                   | 0.142                |
|                  | LP ( 1)             | 1.71887          | Cu 1                | LP*( 7)             | 0.12335          | 18.00                             | 0.63                   | 0.099                |

|                    |         |         |             |         |         |        |      |       |
|--------------------|---------|---------|-------------|---------|---------|--------|------|-------|
| <b>C8 - C9</b>     | $\pi$   | 1.54028 | N 2 - C 6   | $\pi$   | 1.94646 | 33.50  | 0.22 | 0.081 |
|                    | $\pi$   | 1.54028 | C 10 - C 12 | $\pi$   | 1.73271 | 13.48  | 0.28 | 0.057 |
|                    | $\pi$   | 1.54028 | C 14 - C 16 | $\pi$   | 1.72695 | 24.18  | 0.28 | 0.076 |
| <b>C10 - C12</b>   | $\pi$   | 1.73271 | C 8 - C 9   | $\pi^*$ | 0.47296 | 21.68  | 0.28 | 0.073 |
|                    | $\pi$   | 1.73271 | C 14 - C 16 | $\pi^*$ | 0.30060 | 15.58  | 0.29 | 0.060 |
| <b>C 14 - C16</b>  | $\pi$   | 1.72695 | C 8 - C 9   | $\pi^*$ | 0.47296 | 14.05  | 0.28 | 0.059 |
|                    | $\pi$   | 1.72695 | C 10 - C 12 | $\pi^*$ | 0.28611 | 22.54  | 0.29 | 0.072 |
| <b>C 26 - C27</b>  | $\pi$   | 1.54207 | N 5 - C 24  | $\pi^*$ | 0.25302 | 32.56  | 0.23 | 0.081 |
|                    | $\pi$   | 1.54207 | C 28 - C 30 | $\pi^*$ | 0.28968 | 13.61  | 0.28 | 0.057 |
|                    | $\pi$   | 1.54207 | C 32 - C 34 | $\pi^*$ | 0.29859 | 24.10  | 0.28 | 0.076 |
| <b>C 28 - C30</b>  | $\pi$   | 1.73119 | C 26 - C 27 | $\pi^*$ | 0.46953 | 21.78  | 0.28 | 0.073 |
|                    | $\pi$   | 1.73119 | C 32 - C 34 | $\pi^*$ | 0.29859 | 15.66  | 0.29 | 0.060 |
| <b>C32 - C 34</b>  | $\pi$   | 1.72195 | C 26 - C 27 | $\pi^*$ | 0.46953 | 14.22  | 0.28 | 0.059 |
|                    | $\pi$   | 1.72195 | C 28 - C 30 | $\pi^*$ | 0.28968 | 22.82  | 0.28 | 0.072 |
| <b>O 3</b>         | LP ( 3) | 1.70074 | C 8 - C 9   | $\pi^*$ | 0.47296 | 52.15  | 0.28 | 0.113 |
| <b>O 4</b>         | LP ( 3) | 1.70255 | C 26 - C 27 | $\pi^*$ | 0.46953 | 50.79  | 0.29 | 0.112 |
| <b>N 2 - C 6</b>   | $\pi^*$ | 0.26037 | C 8 - C 9   | $\pi^*$ | 0.47296 | 65.66  | 0.04 | 0.078 |
| <b>N 5 - C24</b>   | $\pi^*$ | 0.25302 | C 26 - C 27 | $\pi^*$ | 0.46953 | 66.61  | 0.04 | 0.077 |
| <b>C 8 - C 9</b>   | $\pi^*$ | 0.47296 | C 10 - C 12 | $\pi^*$ | 0.28611 | 287.72 | 0.01 | 0.080 |
|                    | $\pi^*$ | 0.47296 | C 14 - C 16 | $\pi^*$ | 0.30060 | 260.58 | 0.01 | 0.076 |
| <b>C 26 - C27</b>  | $\pi^*$ | 0.46953 | C 32 - C 34 | $\pi^*$ | 0.29859 | 262.99 | 0.01 | 0.076 |
| <b>Cu 36</b>       | LP*( 6) | 0.26625 | Cu 36       | LP*( 8) | 0.12054 | 11.41  | 0.04 | 0.043 |
|                    | LP*( 6) | 0.26625 | Cu 36       | RY*( 1) | 0.00128 | 19.52  | 2.75 | 0.565 |
|                    | LP*( 6) | 0.26625 | Cu 36       | RY*( 3) | 0.00067 | 14.07  | 1.32 | 0.333 |
|                    | LP*( 6) | 0.26625 | Cu 36       | RY*( 7) | 0.00027 | 17.73  | 0.23 | 0.155 |
|                    | LP*( 6) | 0.26625 | Cu 36       | RY*( 8) | 0.00019 | 15.36  | 2.74 | 0.502 |
| <b>N 37</b>        | LP ( 1) | 1.72927 | Cu 36       | LP*( 6) | 0.26625 | 40.50  | 0.63 | 0.143 |
|                    | LP ( 1) | 1.72927 | Cu 36       | LP*( 8) | 0.12054 | 17.45  | 0.67 | 0.100 |
| <b>O 38</b>        | LP ( 1) | 1.92366 | Cu 36       | LP*( 7) | 0.12332 | 15.42  | 0.78 | 0.099 |
|                    | LP ( 1) | 1.92366 | Cu 36       | LP*( 8) | 0.12054 | 11.95  | 0.81 | 0.089 |
|                    | LP ( 2) | 1.76288 | Cu 36       | LP*( 6) | 0.26625 | 27.22  | 0.63 | 0.118 |
|                    | LP ( 2) | 1.76288 | Cu 36       | LP*( 7) | 0.12332 | 19.83  | 0.63 | 0.103 |
| <b>O 39</b>        | LP ( 1) | 1.92236 | Cu 36       | LP*( 8) | 0.12054 | 24.05  | 0.81 | 0.126 |
|                    | LP ( 2) | 1.70255 | Cu 36       | LP*( 6) | 0.26625 | 28.37  | 0.63 | 0.121 |
|                    | LP ( 2) | 1.76765 | Cu 36       | LP*( 8) | 0.12054 | 17.49  | 0.67 | 0.099 |
| <b>N 40</b>        | LP ( 1) | 1.71894 | Cu 36       | LP*( 6) | 0.26625 | 40.10  | 0.63 | 0.142 |
|                    | LP ( 1) | 1.71894 | Cu 36       | LP*( 7) | 0.12332 | 17.99  | 0.63 | 0.099 |
| <b>C 45 - C47</b>  | $\pi$   | 1.73270 | C 43 - C 44 | $\pi^*$ | 0.47295 | 21.68  | 0.28 | 0.073 |
|                    | $\pi$   | 1.73270 | C 49 - C 51 | $\pi^*$ | 0.30059 | 15.58  | 0.29 | 0.060 |
| <b>C49 - C 51</b>  | $\pi$   | 1.72695 | C 43 - C 44 | $\pi^*$ | 0.47295 | 14.05  | 0.28 | 0.059 |
|                    | $\pi$   | 1.72695 | C 45 - C 47 | $\pi^*$ | 0.28613 | 22.54  | 0.29 | 0.072 |
| <b>C 61 - C 62</b> | $\pi$   | 1.54208 | N 40 - C 59 | $\pi^*$ | 0.01792 | 32.55  | 0.23 | 0.081 |
|                    | $\pi$   | 1.54208 | C 63 - C 65 | $\pi^*$ | 0.28966 | 13.61  | 0.28 | 0.057 |
|                    | $\pi$   | 1.54208 | C 67 - C 69 | $\pi^*$ | 0.29863 | 24.10  | 0.28 | 0.076 |
| <b>C 63 - C65</b>  | $\pi$   | 1.97929 | C 61 - C 62 | $\pi^*$ | 0.05068 | 21.78  | 0.28 | 0.073 |
|                    | $\pi$   | 1.97929 | C 67 - C 69 | $\pi^*$ | 0.29863 | 15.66  | 0.29 | 0.060 |
| <b>C67 - C 69</b>  | $\pi$   | 1.72198 | C 61 - C 62 | $\pi^*$ | 0.05068 | 14.22  | 0.28 | 0.059 |

|                   |         |         |             |         |         |        |      |       |
|-------------------|---------|---------|-------------|---------|---------|--------|------|-------|
|                   | $\pi$   | 1.72198 | C 63 - C 65 | $\pi^*$ | 0.28966 | 22.82  | 0.28 | 0.072 |
| <b>O 38</b>       | LP ( 3) | 1.70080 | C 43 - C 44 | $\pi^*$ | 0.47295 | 52.20  | 0.28 | 0.113 |
| <b>O 39</b>       | LP ( 3) | 1.70255 | C 61 - C 62 | $\pi^*$ | 0.46954 | 50.81  | 0.29 | 0.112 |
| <b>N37 - C41</b>  | $\pi^*$ | 0.26041 | C 43 - C 44 | $\pi^*$ | 0.47295 | 65.67  | 0.04 | 0.078 |
| <b>N40 - C59</b>  | $\pi^*$ | 0.01792 | C 61 - C 62 | $\pi^*$ | 0.46954 | 66.60  | 0.04 | 0.077 |
| <b>C43 - C 44</b> | $\pi^*$ | 0.47295 | C 45 - C 47 | $\pi^*$ | 0.28613 | 287.75 | 0.01 | 0.080 |
|                   | $\pi^*$ | 0.47295 | C 49 - C 51 | $\pi^*$ | 0.30059 | 260.56 | 0.01 | 0.076 |
|                   | $\pi$   | 1.54027 | N 37 - C 41 | $\pi^*$ | 0.26041 | 33.51  | 0.22 | 0.081 |
|                   | $\pi$   | 1.54027 | C 45 - C 47 | $\pi^*$ | 0.28613 | 13.48  | 0.28 | 0.057 |
|                   | $\pi$   | 1.54027 | C 49 - C 51 | $\pi^*$ | 0.30059 | 24.18  | 0.28 | 0.076 |
| <b>C61 - C 62</b> | $\pi^*$ | 0.46954 | C 67 - C 69 | $\pi^*$ | 0.29863 | 263.12 | 0.01 | 0.076 |

**Table S7** Charge conducting parameters of CTFD.

| Condition | $\epsilon_r$          | $\mu_{eff}$<br>( $m^2V^{-1}s^{-1}$ ) | $\tau$<br>(sec)       | $D$                   | $L_D$<br>(m)           |
|-----------|-----------------------|--------------------------------------|-----------------------|-----------------------|------------------------|
| Dark      |                       | $8.25 \times 10^{-6}$                | $3.44 \times 10^{-8}$ | $1.62 \times 10^{-5}$ | $1.207 \times 10^{-7}$ |
| Light     | $5.35 \times 10^{-1}$ | $2.11 \times 10^{-5}$                | $1.35 \times 10^{-8}$ | $1.05 \times 10^{-4}$ | $1.212 \times 10^{-7}$ |

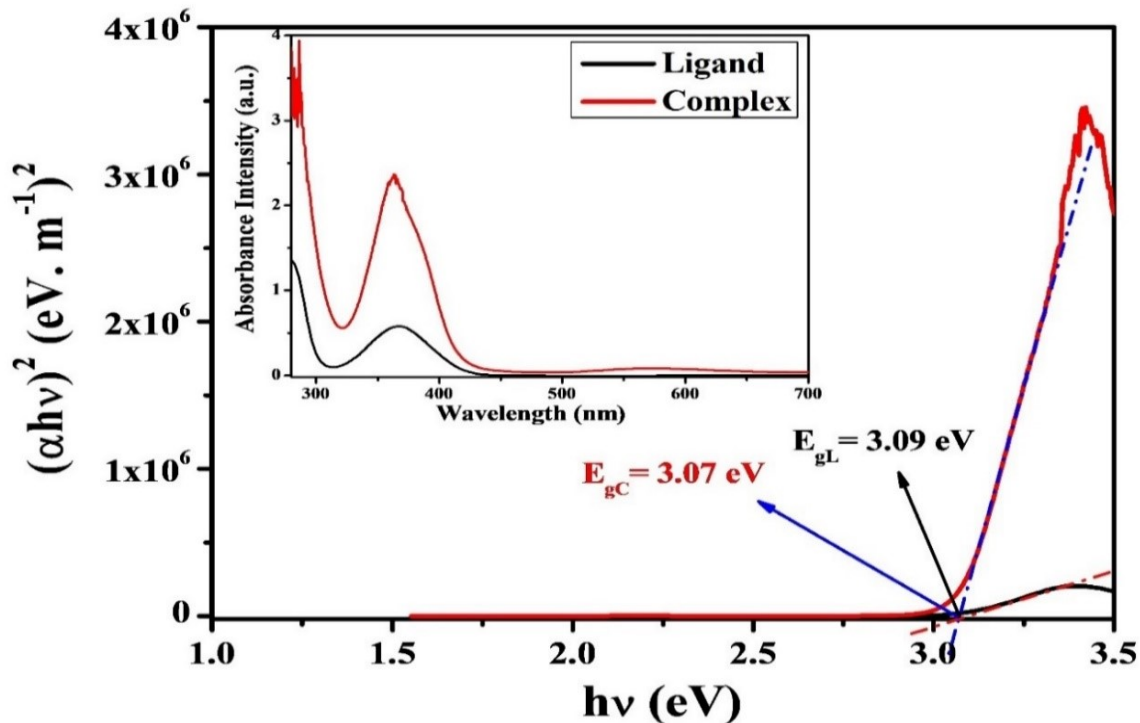

**Fig.S1A.** The absorbance spectrum (inset) and the optical Band gap of  $H_2L^{SAL}$  and the complex from Tauc's plots.

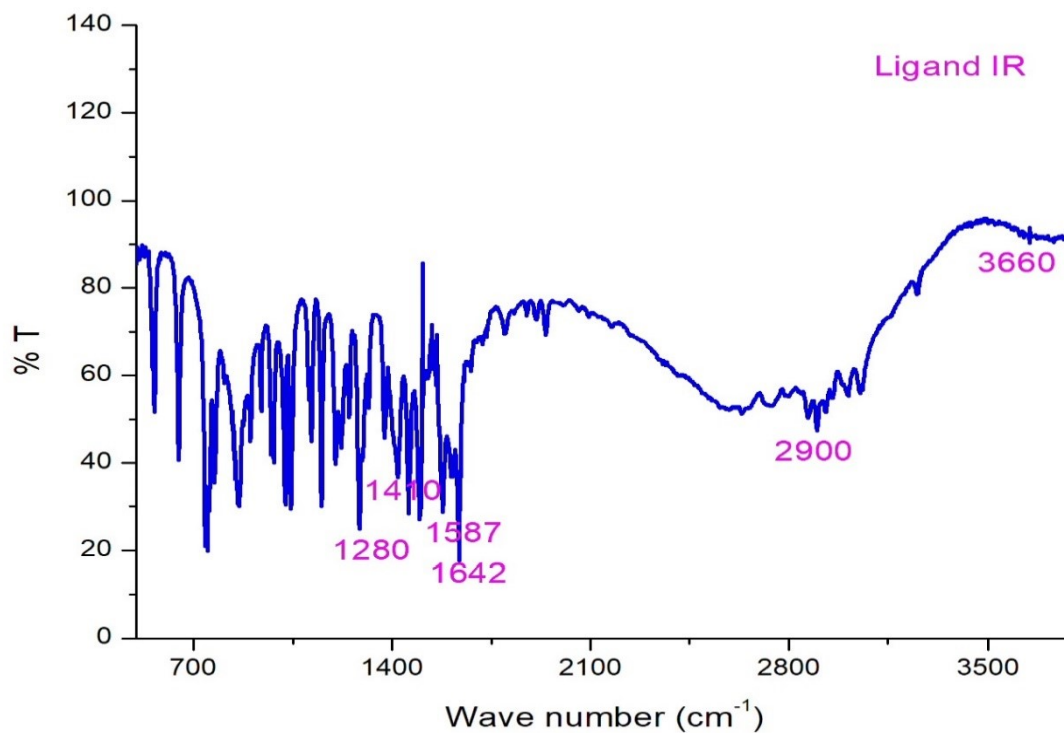

Fig.S1B. IR spectrum of  $H_2L^{SAL}$ .

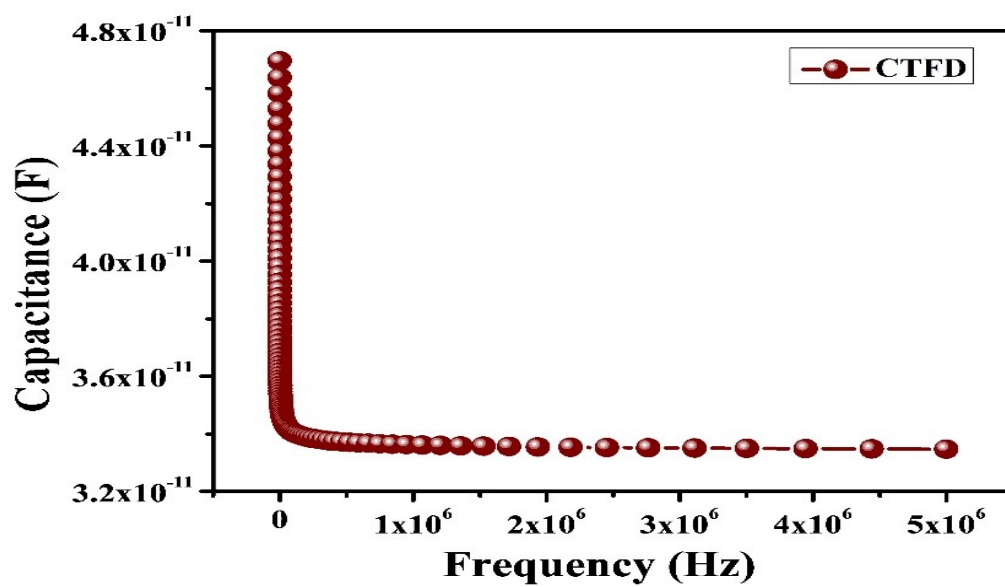

Fig.S1C. Capacitance vs. Frequency graph of CTFD.

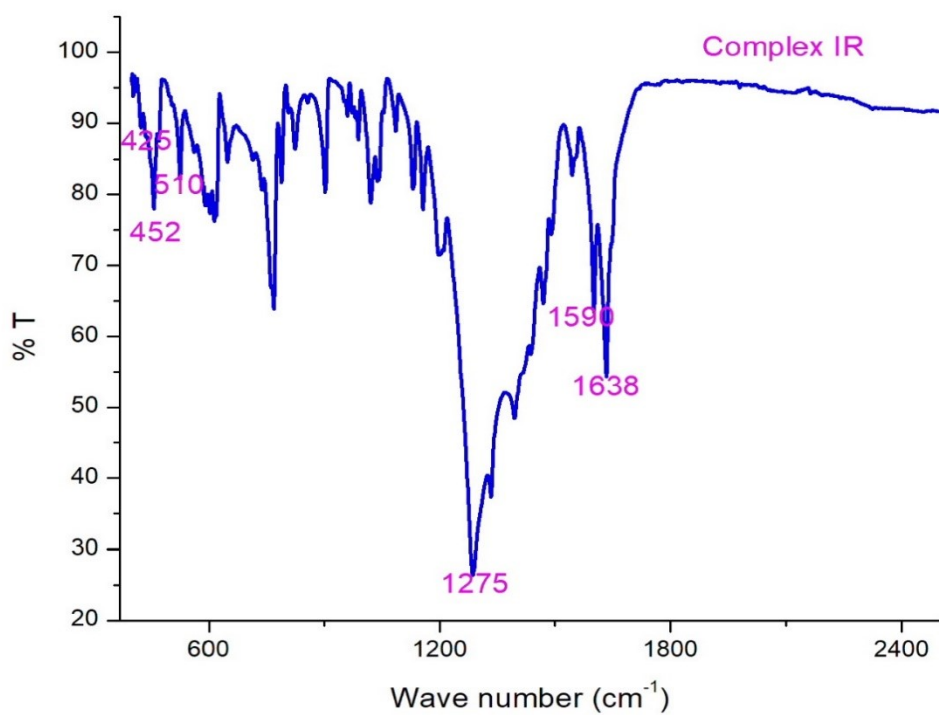

Fig.S2. IR spectrum of the complex.

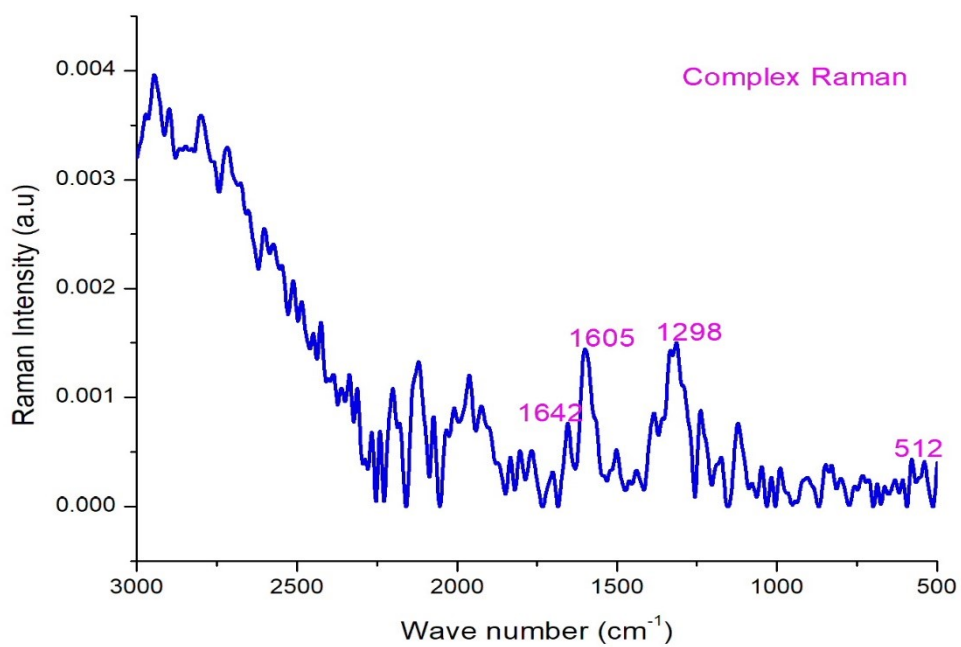

g.S3. Raman spectrum of the complex.

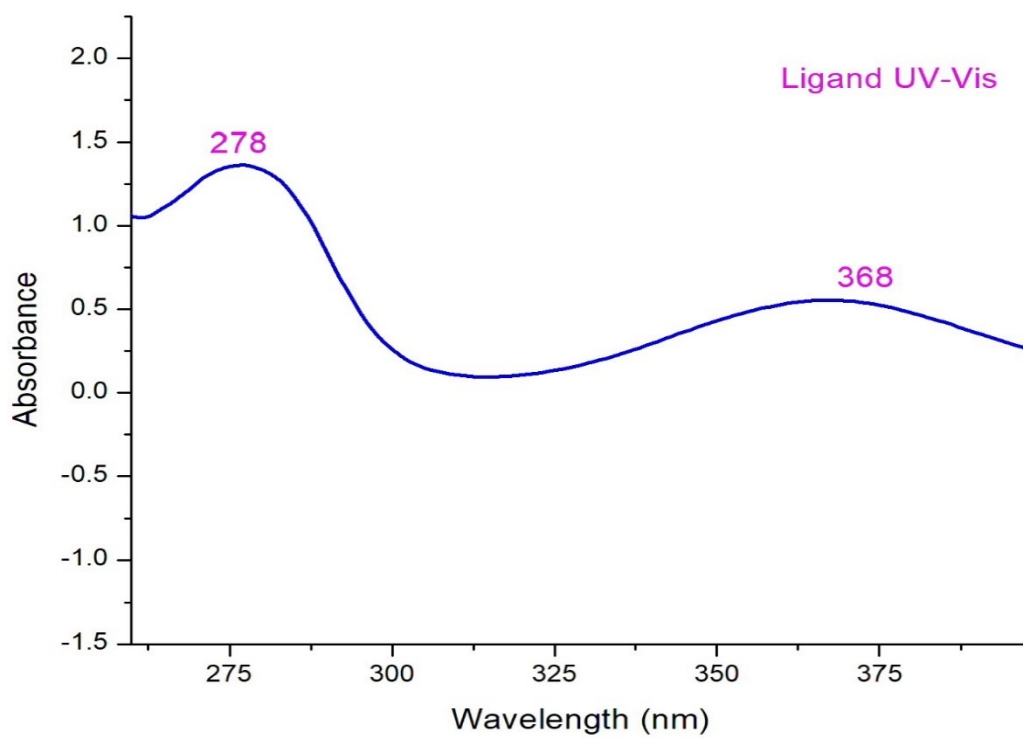

**Fig.S4.** Ligand ( $H_2L^{SAL}$ ) UV-Visible spectrum.

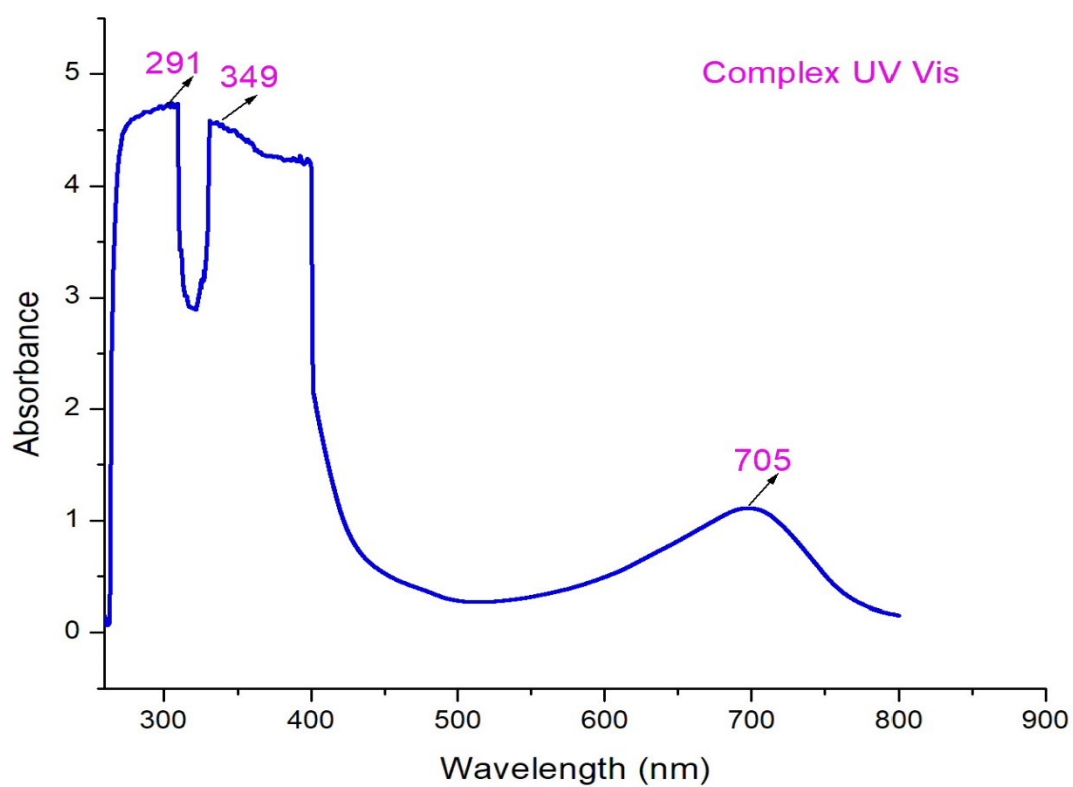

**Fig.S5.** Complex UV-Visible spectrum.

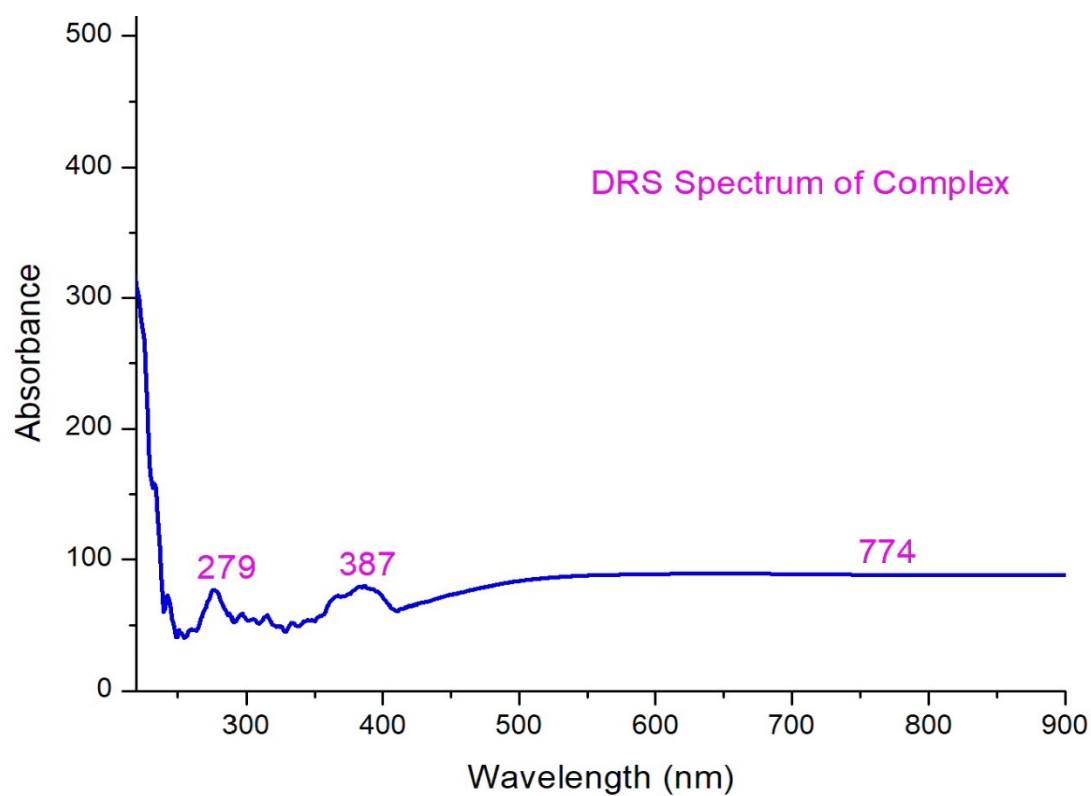

Fig.S6. Complex DRS spectrum.

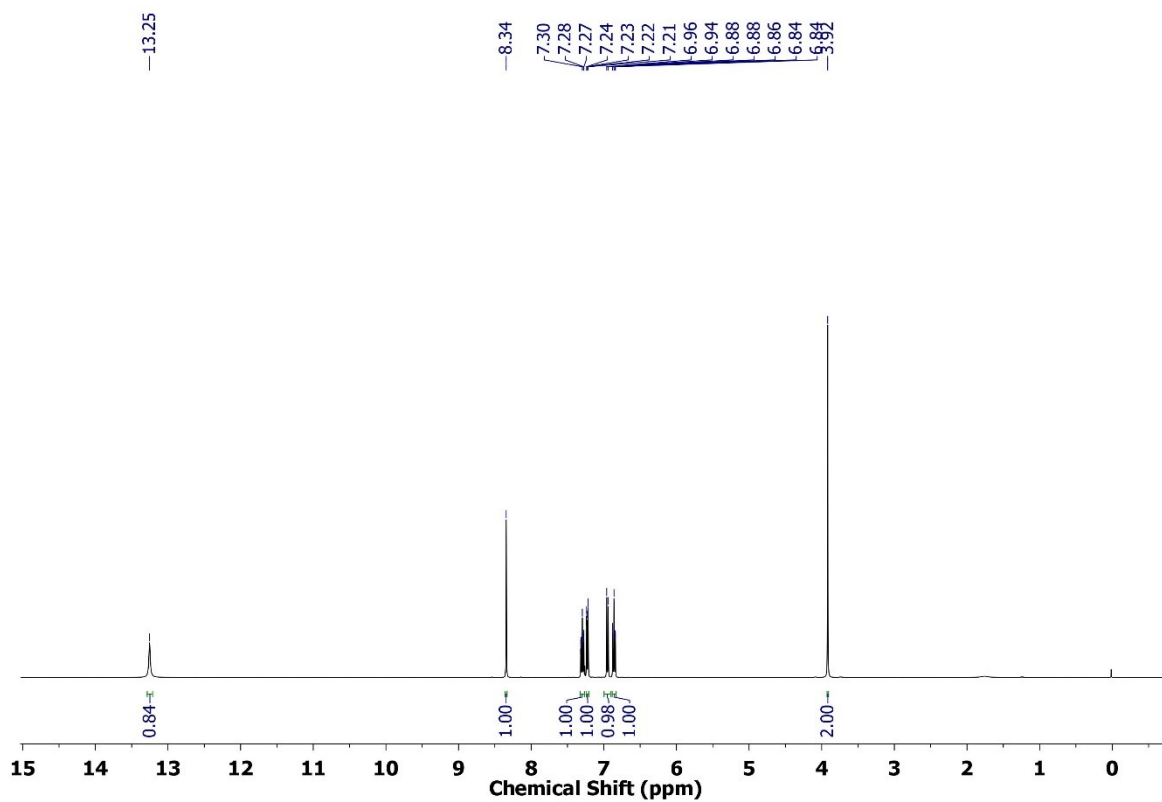

Fig.S7.  $^1\text{H}$  NMR spectra of  $\text{H}_2\text{L}^{\text{SAL}}$ .

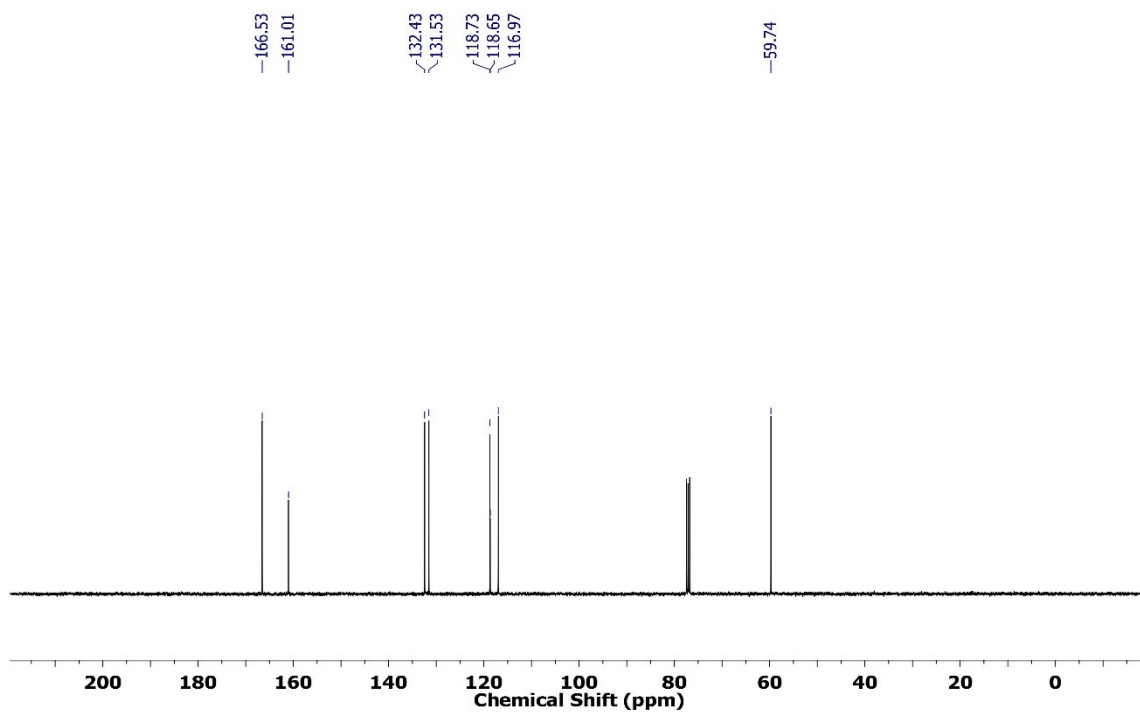

Fig.S8.  $^{13}\text{C}$  NMR spectra of  $\text{H}_2\text{L}^{\text{SAL}}$ .

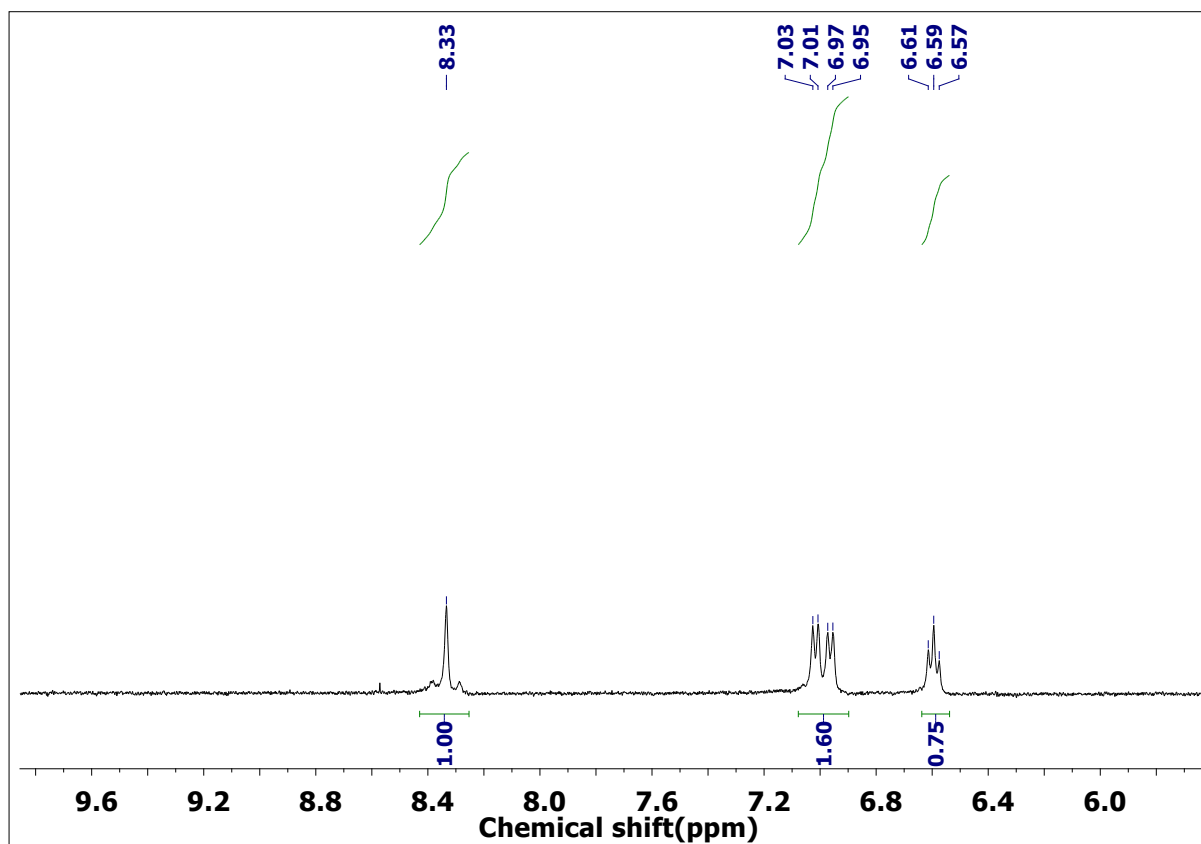

Fig.S9.  $^1\text{H}$  NMR spectra of complex.



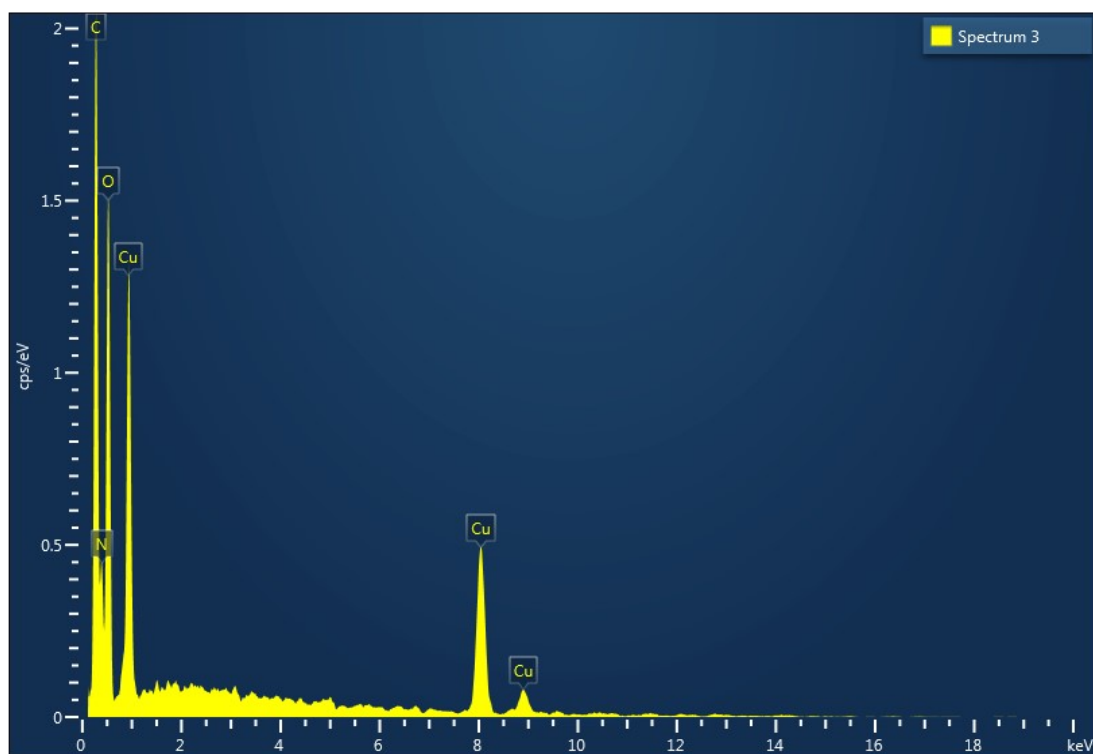

**Fig.S10.** Complex EDX profiles.

| Element       | Line Type | Wt. % | Atomic % |
|---------------|-----------|-------|----------|
| <b>C</b>      | K series  | 38.59 | 51.31    |
| <b>N</b>      | K series  | 12.31 | 14.04    |
| <b>O</b>      | K series  | 29.87 | 29.82    |
| <b>Cu</b>     | K series  | 19.22 | 4.83     |
| <b>Total:</b> |           | 100   | 100      |

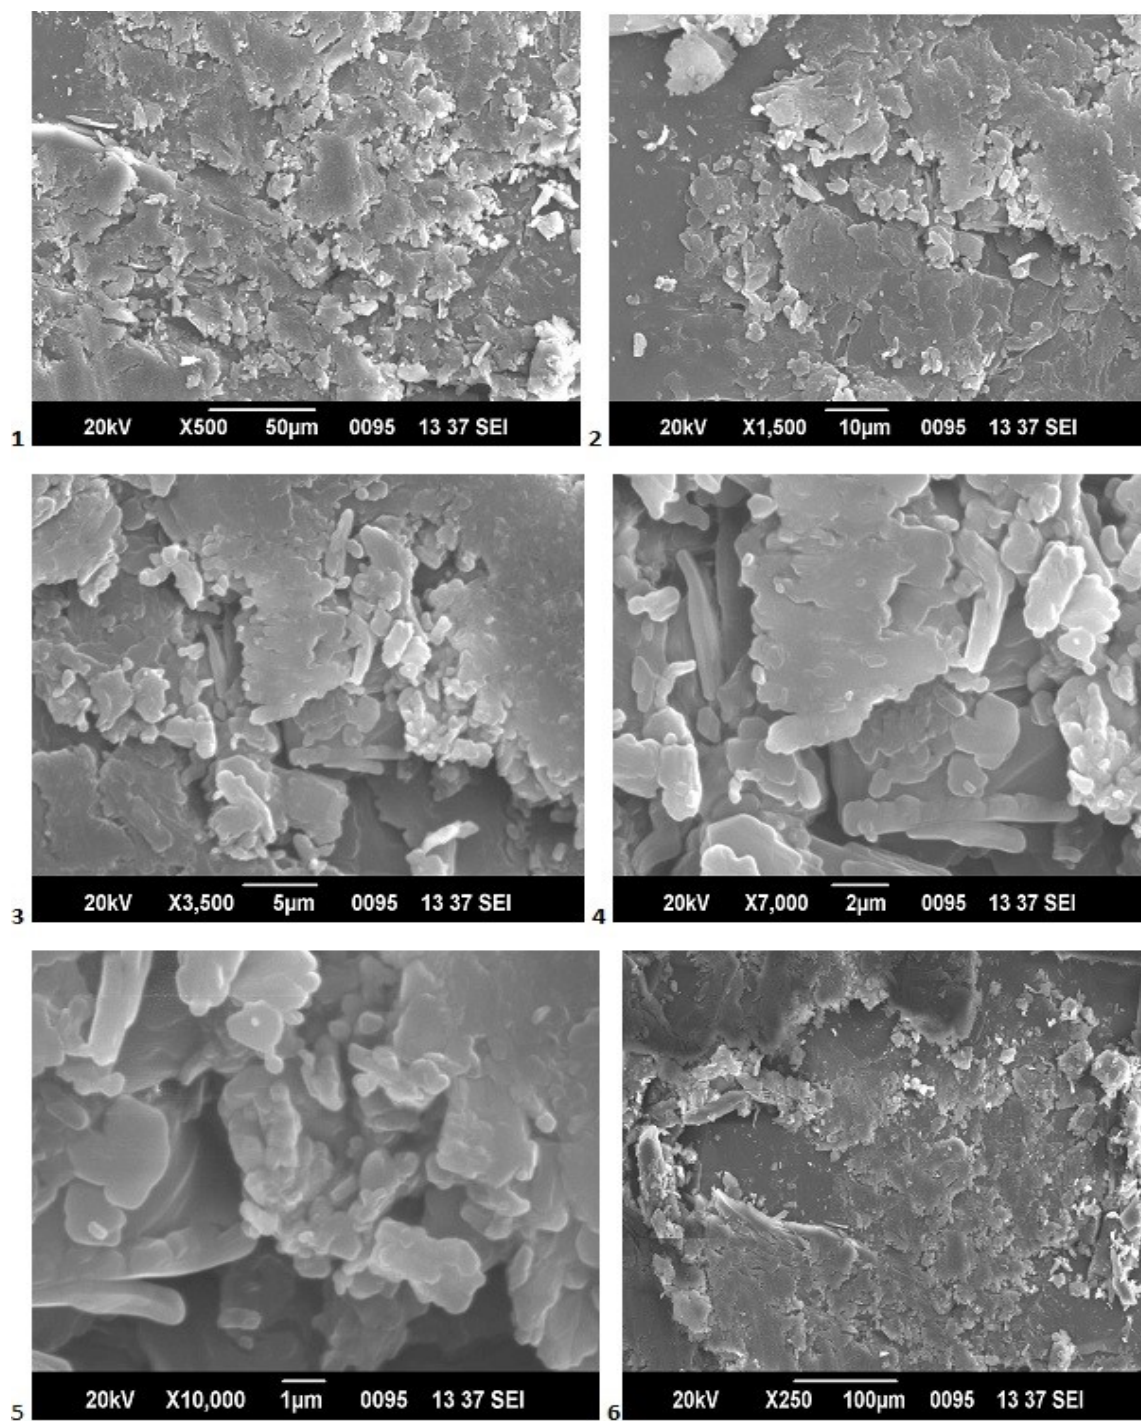

Fig.

S11. SEM micrographs (1-6) for H<sub>2</sub>L<sup>SAL</sup>.

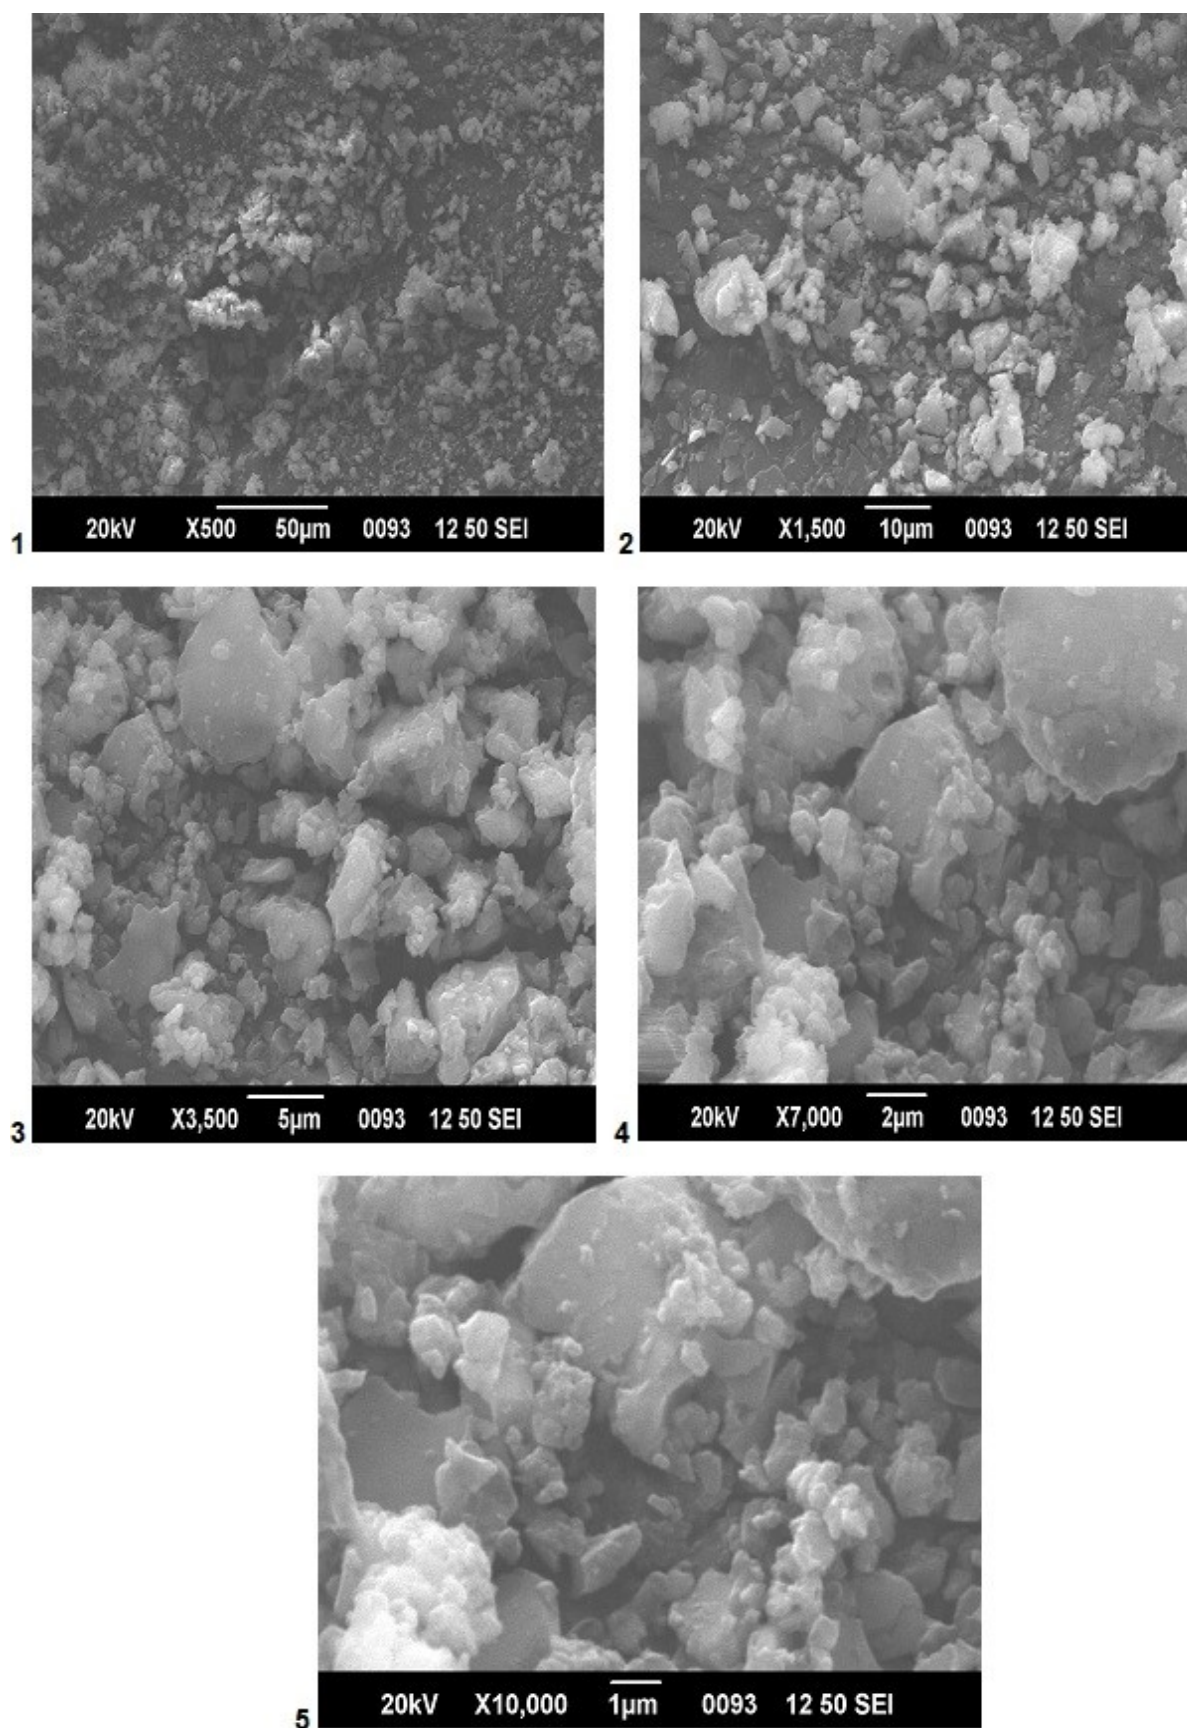

Fig.S12. SEM micrographs (1-5) for the copper complex.

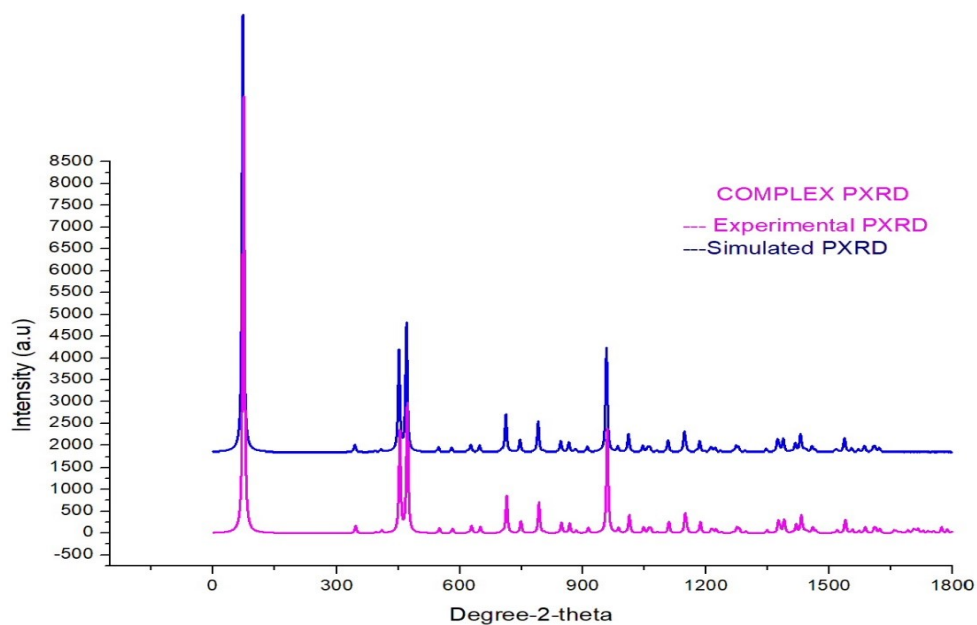

**Fig.S13.** Copper complex PXRD graph.

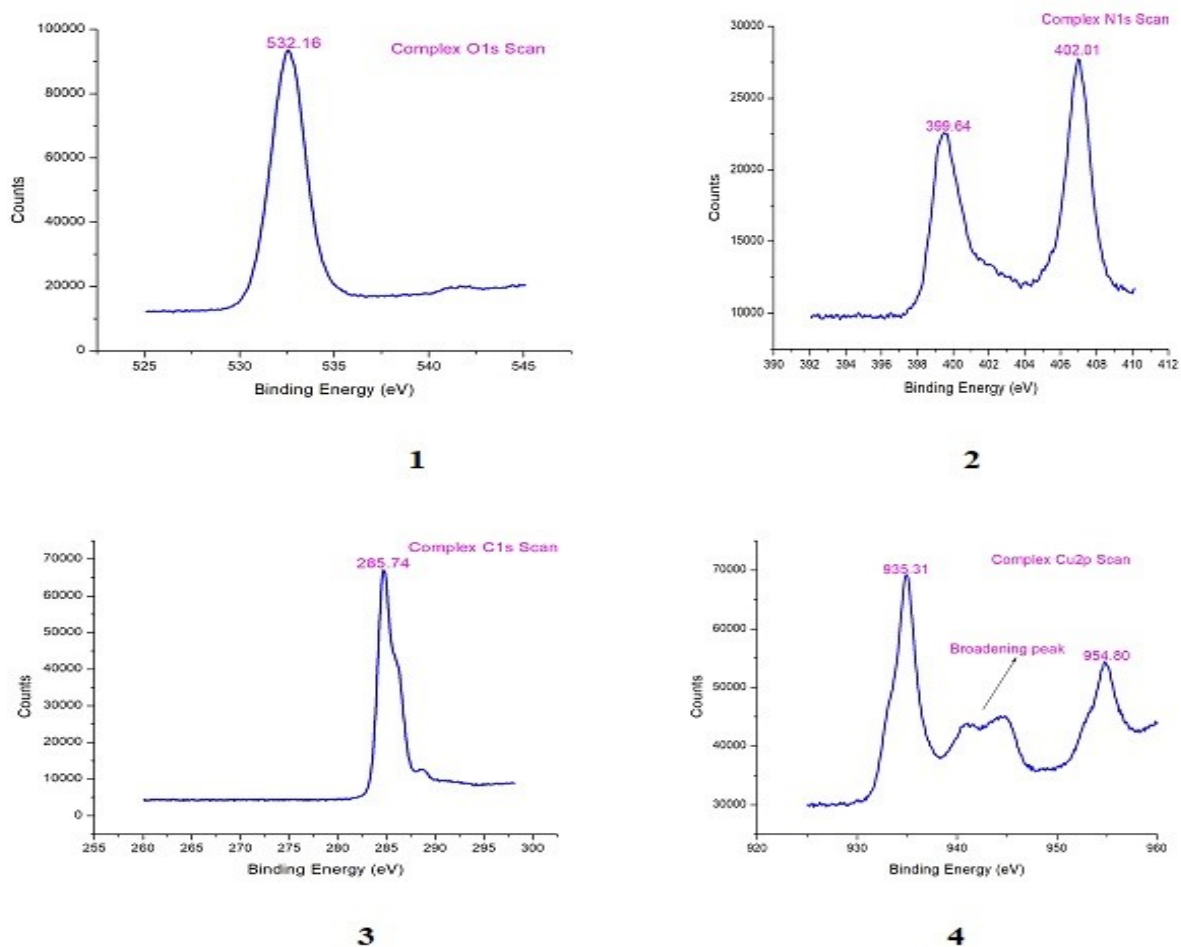

**Fig.S14.** XPS spectra of (1) O1s, (2) N1s, (3) C1s, and (4) Cu2p.

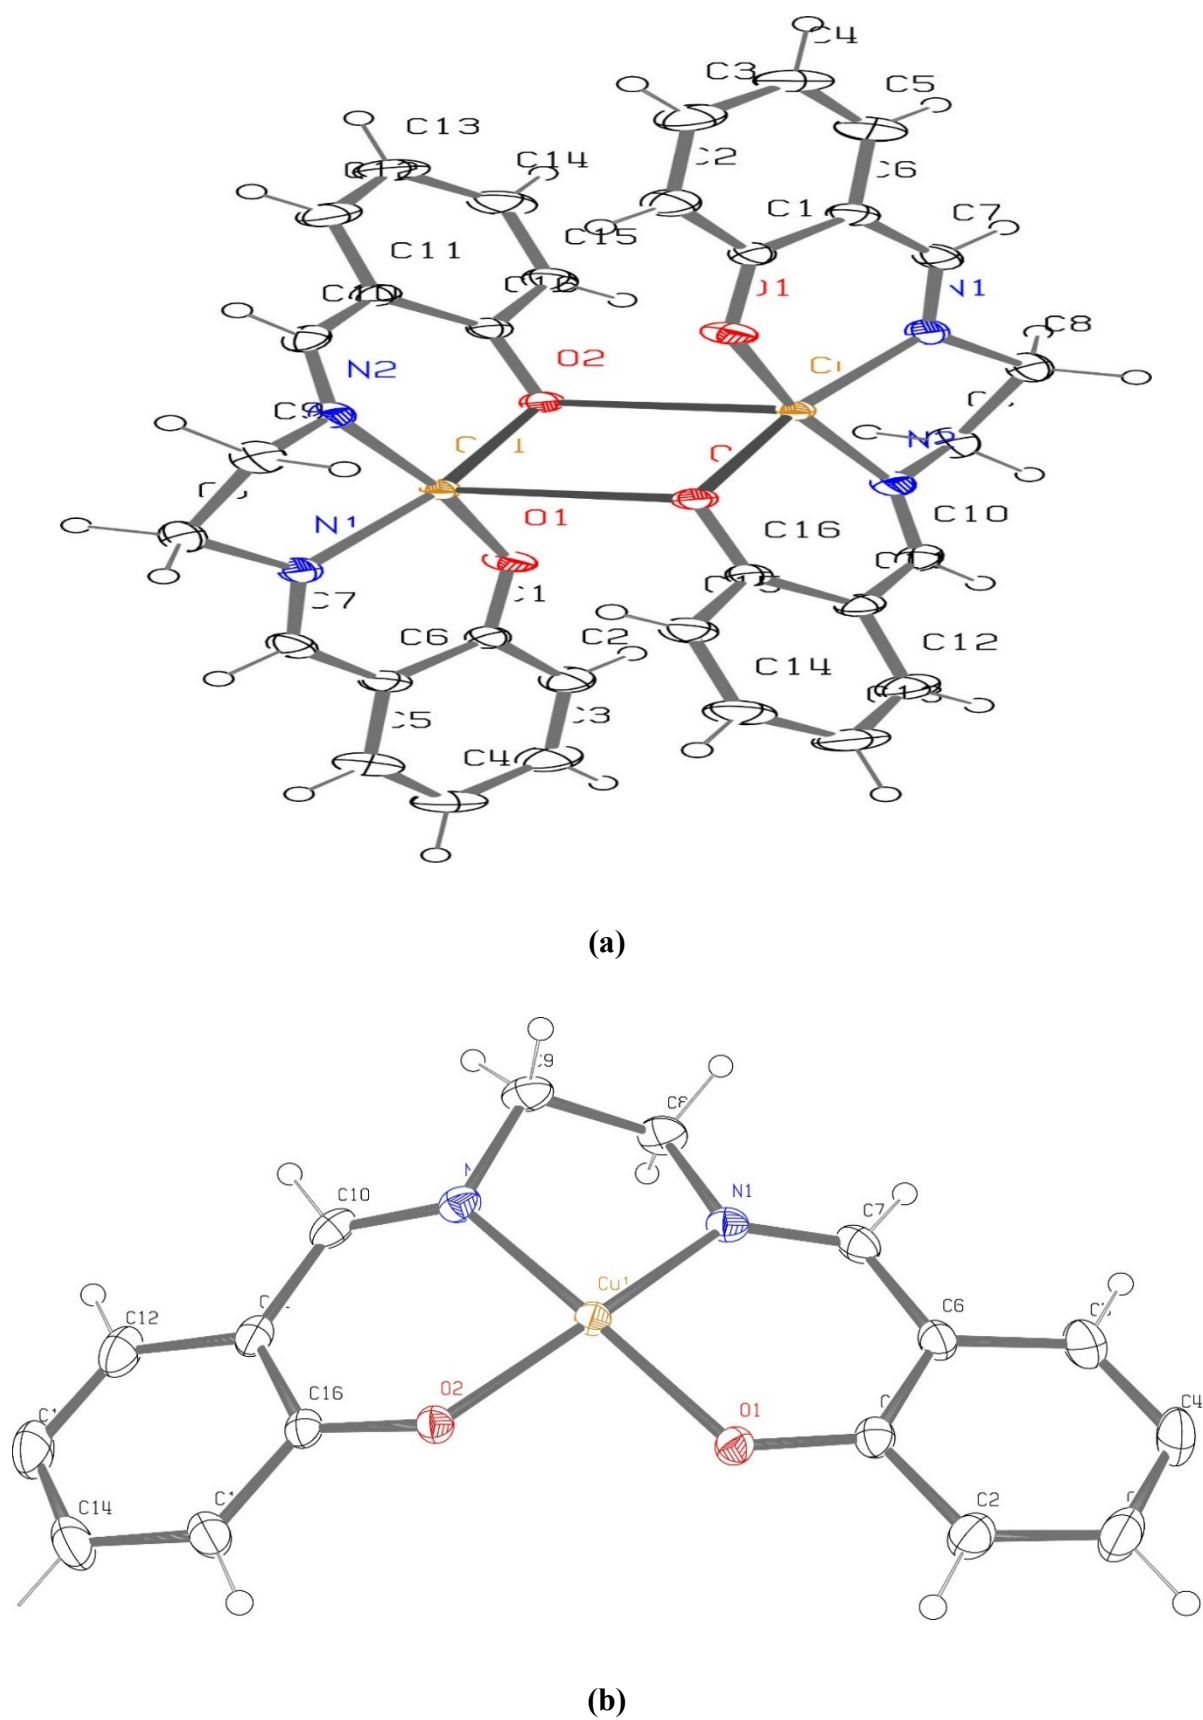

**Fig.S15.** ORTEP view of the complex (atoms are shown as 50% thermal ellipsoids).

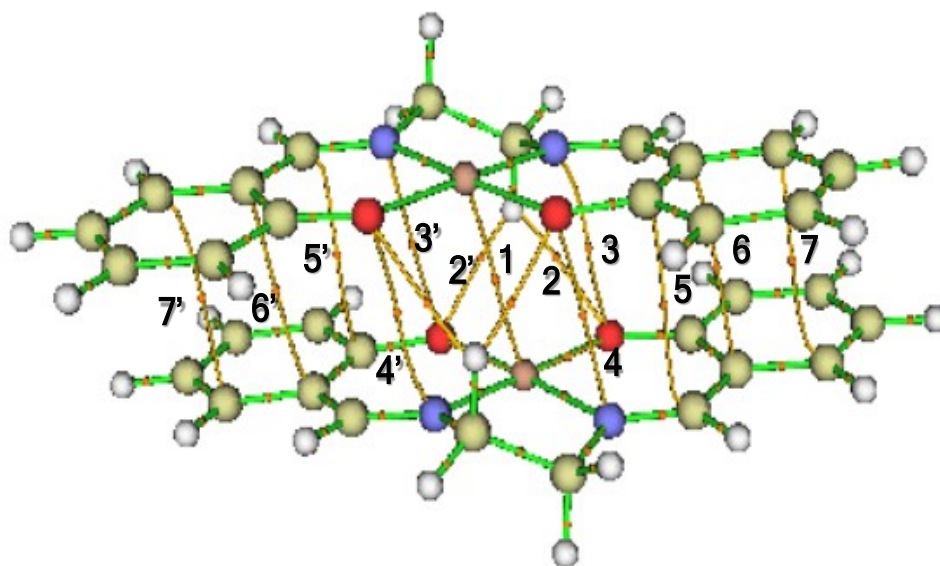

**Fig.S16.** QTAIM graph depicting BCPs of the studied complex.

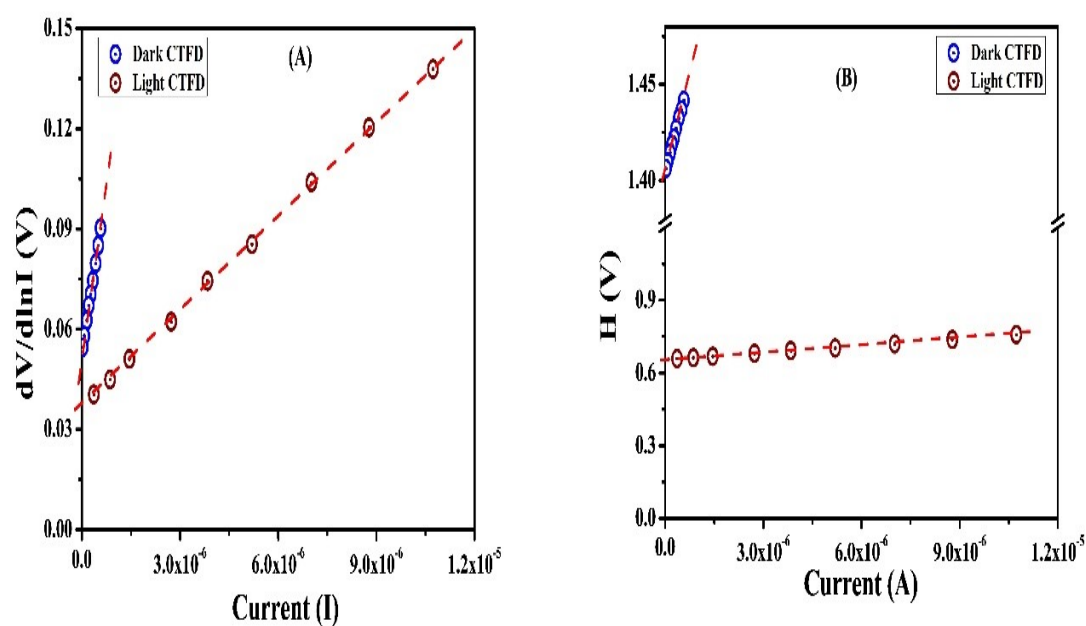

**Fig.S17**

(A) for  $dV/d\ln I$  vs.  $I$  and S17(B)  $H$  vs.  $I$  curve for CTFD under dark and photo illumination conditions.

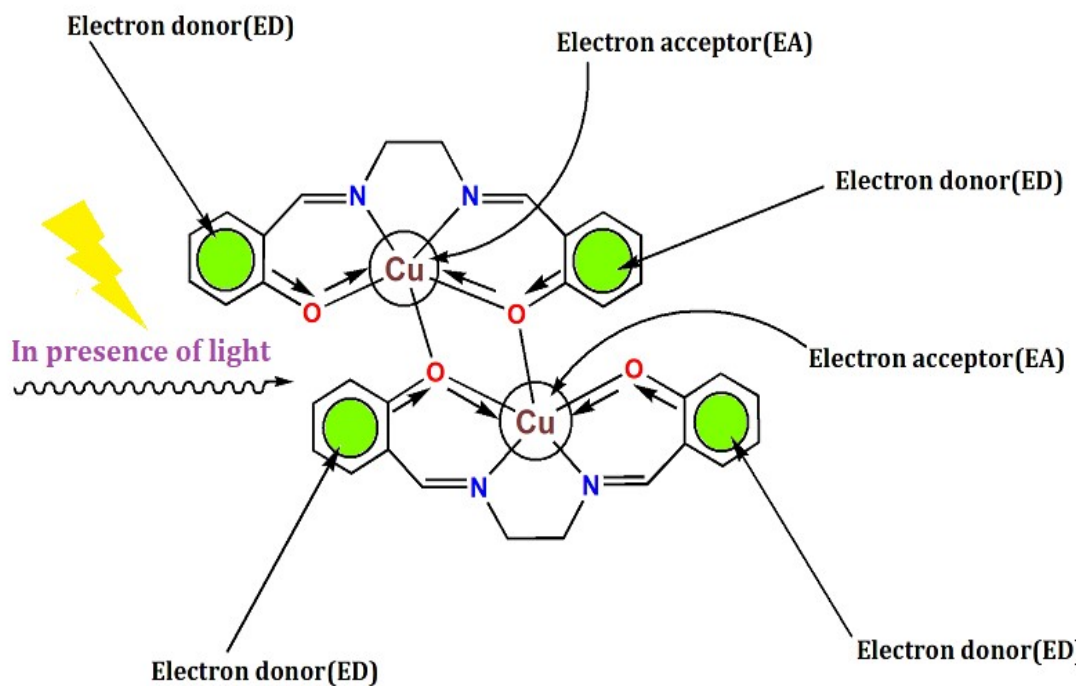

**Fig.S18.** A probable mechanism of photosensitivity of the copper complex.

## References

1. M. Ghosh, S. Saha, A. Banerjee, D. Schollmeyer, A. Sarkar, and S. Banerjee, *New J. Chem.*, 2019, **43**, 16255-16263.
2. F. Ahmed, S. Halder, B. Dutta, S. Islam, C. Sen, S. Kundu, C. Sinha, P. P. Ray, and M. H. Mir, *New J. Chem*, 2017, **41**, 11317—11323.
3. B. Dutta, C. Sinha, and M. H. Mir, *J. Mol. Struct.*, 2019, **1197**, 430-435.
4. B. Dutta, A. Dey, K. Naskar, F. Ahmed, R. Purkait, S. Islam, S. Ghosh, C. R. Sinha, P. P. Ray, and M. H. Mir, *New J. Chem.*, 2018, **42**, 8629-8637.
5. B. Dutta, D. Das, K. Raksha, C. Sinha, S. Khanra, P. P. Ray, and M. H. Mir, *Mater. Adv.*, 2023, **4**, 215–222.
6. S. Khan, S. Halder, A. Dey, B. Dutta, P. P. Ray, and S. Chattopadhyaya, *New J. Chem.*, 2020, **44**, 11622-11630.

7. S. Khan, S. Halder, P. P. Ray, S. Herrero, R. González-Prieto, M. G. B. Drew, and S. Chattopadhyay, *Crystal Growth & Design*, 2018, **18**, 651-659.
8. M. Mondal, S. Jana, M. G. B. Drew, and A. Ghosh, *Polymer*, 2020, **204**, 122815
9. S. Halder, M. Das, K. Ghosh, A. Dey, B. B. Show, P. P. Ray, and P. Roy, *J Mater Sci.*, 2016, **51**, 9394–9403.
10. Ayub Tahmasbi 1, Akbar Jafari, and Abbas Nikoo, *Sci Rep.*, 2023, **13**, 10988.
11. S. Roy, A. Dey, P. P. Ray, J. Ortega-Castro, A. Frontera, and S. Chattopadhyay, *Chem. Commun.*, 2015, **51**, 12974–12976.
12. S. Halder, A. Layek, K. Ghosh, C. Rizzoli, P. P. Ray, and P. Roy, *Dalton Trans.*, 2015, **44**, 16149–16155.
13. S. Halder, A. Dey, A. Bhattacharjee, J. Ortega-Castro, A. Frontera, P. P. Ray, and P. Roy, *Dalton Trans.*, 2017, **46**, 11239–11249.
14. P. Ghorai, A. Dey, P. Brandaño, J. Ortega-Castro, A. Bauza, A. Frontera, P. P. Ray, and A. Saha, *Dalton Trans.*, 2017, **46**, 13531–13543.
15. S. Roy, S. Halder, M. G. B. Drew, P. P. Ray. and S. Chattopadhyay, *ACS Omega*, 2018, **3**, 12788–12796.
16. S. Khan, S. Halder, P. P. Ray, S. Herrero, R. González-Prieto, M. G. B. Drew, and S. Chattopadhyay, *Cryst. Growth Des.*, 2018, **18**, 651–659.
17. S. Konar, A. Dey, S. Ray Choudhury, K. Das, S. Chatterjee, P. P. Ray, J. Ortega-Castro, A. Frontera, and S. Mukhopadhyay, *J. Phys. Chem. C*, 2018, **122**, 8724–8734.
18. P. Ghorai, A. Dey, A. Hazra, B. Dutta, P. Brandaño, P. P. Ray, P. Banerjee, and A. Saha, *Cryst. Growth Des.*, 2019, **19**, 6431–6447.
19. S. Roy, A. Dey, M. G. B. Drew, P. P. Ray, and S. Chattopadhyay, *New J. Chem.*, 2019, **43**, 5020–5031.



20. S. Dey, S. Sil, B. Dutta, K. Naskar, S. Maity, P. P. Ray, and C. Sinha, *ACS Omega*, 2019, **4**, 19959–19968.
21. K. Ghosh, S. Sil, P. P. Ray, J. Ortega-Castro, A. Frontera, and S. Chattopadhyay, *RSC Adv.*, 2019, **9**, 34710–34719.
22. S. Roy, S. Halder, A. Dey, K. Harms, P. P. Ray, and S. Chattopadhyay, *New J. Chem.*, 2020, **44**, 1285–1293.
23. P. Ghorai, A. Dey, P. Brandaño, S. Benmansour, C. J. Go´mez Garcia, P. P. Ray, and A. Sahaw, *Inorg. Chem.*, 2020, **59**, 8749–8761.
24. S. Khan, S. Halder, A. Dey, B. Dutta, P. P. Ray, and S. Chattopadhyay, *New J. Chem.*, 2020, **44**, 11622–11630.
25. T. K. Ghosh, S. Jana, S. Jana, and A. Ghosh, *New J. Chem.*, 2020, **44**, 14733–14743.
26. A. Chandra, D. Das, J. O. Castro, K. Naskar, S. Jana, A. Frontera, P. P. Ray, and C. Sinha, *Inorg. Chim. Acta*, 2021, **518**, 120253.
27. S. Roy, A. Dey, R. M. Gomila, J. Ortega-Castro, A. Frontera, P. P. Ray, and S. Chattopadhyay, *Dalton Trans.*, 2022, **51**, 5721–5734.
28. S. Paul, B. Dutta, P. Das, S. Halder, M. Shit, P. P. Ray, K. Jana, and C. Sinha, *Appl. Organomet. Chem.*, 2023, **37**, e7160.
29. K. Debsharma, S. Dey, D. Das, S. Halder, J. Ortega-Castro, S. Sarkar, B. Dutta, S. Maity, K. Jana, A. Frontera, P. P. Ray, and C. Sinha, *CrystEngComm*, 2023, **25**, 162–172.
30. D. Majumdar, S. Roy, A. Dey and D. Sutradhar, *J. Mol. Struct.*, 2023, 1294, 136438.
